1     **XPC deficiency increases risk of hematologic malignancies through**  
2             **mutator phenotype and characteristic mutational signature**

3

4     Andrey A. Yurchenko<sup>1</sup>, Ismael Padioleau<sup>1</sup>, Bakhyt T. Matkarimov<sup>2</sup>, Jean Soulier<sup>3</sup>,  
5                             Alain Sarasin<sup>4</sup>, Sergey Nikolaev<sup>1\*</sup>

6

7     <sup>1</sup>INSERM U981, Gustave Roussy Cancer Campus, Université Paris Saclay,  
8     Villejuif, France

9     <sup>2</sup>National laboratory Astana, Nazarbayev University, Astana 010000, Kazakhstan

10    <sup>3</sup>INSERM UMR944 and CNRS UMR7212, Hôpital Saint-Louis, Paris, France

11    <sup>4</sup>CNRS UMR9019 Genome Integrity and Cancers, Institut Gustave Roussy,  
12    Université Paris-Saclay, Villejuif, France

13

14    \* -address for correspondence: Dr. Sergey Nikolaev, CR1 INSERM U981, Head of  
15    Cancer Genomics Lab, B2M, Gustave Roussy Cancer Campus, 114 rue Edouard  
16    Vaillant, 94805, Villejuif Cedex, France, Phone: +33 1 42 11 5775, Email:  
17    sergey.nikolaev@gustaveroussy.fr

18

19

20

## 21           **ABSTRACT**

22           Recent studies demonstrated a dramatically increased risk of leukemia in  
23 patients with a rare genetic disorder, Xeroderma Pigmentosum group C (XP-C),  
24 characterized by constitutive deficiency of global genome nucleotide excision  
25 repair (GG-NER). However, the genetic mechanisms of non-skin cancers in XP-C  
26 patients remain unexplored. In this study, we analyzed a unique collection of  
27 internal XP-C tumor genomes including 6 leukemias and 2 sarcomas. We observed  
28 an average of 25-fold increase of mutation rates in XP-C vs. sporadic leukemia  
29 which we presume leads to its elevated incidence and early appearance. In all XP-  
30 C tumors predominant mutational process is characterized by a distinct mutational  
31 signature, highlighting a specific mutational pattern in the context of GG-NER  
32 deficiency. We observed a strong mutational asymmetry with respect to  
33 transcription and the direction of replication in XP-C tumors suggesting  
34 association of mutagenesis with bulky purine DNA lesions of probably  
35 endogenous origin. These findings suggest existence of a balance between  
36 formation and repair of bulky DNA lesions by GG-NER in human body cells  
37 which is disrupted in XP-C patients leading to internal cancers.

38

39

## 40           **INTRODUCTION**

41           Xeroderma Pigmentosum is a group of rare recessive genetic disorders  
42 which includes seven complementation groups (A-G) characterized by constitutive  
43 biallelic deficiency of Nucleotide Excision Repair (NER) pathway, and XP variant  
44 (loss of polymerase  $\eta$ ; Lehmann et al., 2011). NER serves as a primary pathway  
45 for repairing various helix-distorting DNA adducts. The NER is subdivided into  
46 global genome (GG-NER) and transcription-coupled (TC-NER) sub-pathways  
47 which preferentially operate genome-wide and on the transcribed DNA strand of  
48 genes respectively. XP patients demonstrate striking tumor-prone phenotype with  
49 near 10000-times increased risk of non-melanoma skin cancer and 2000-times risk  
50 of melanoma due to the inability of cells to efficiently repair the major UV

51 photoproducts (Bradford et al., 2011; Kraemer et al., 1994). XP complementation  
52 group C (XP-C) characterized by GG-NER deficiency (but with an unaffected TC-  
53 NER) is one of the most tumor susceptible subtypes of XP (Sethi et al., 2013).  
54 Moreover, it was hypothesized that XP patients may harbor 10-20 times increased  
55 risk to some types of internal tumors including leukemia, sarcomas (Kraemer,  
56 1987) and thyroid nodules (Hadj-Rabia et al., 2013; Jerbi et al., 2016).

57 Two recent studies reported a more than a thousand-fold increased risk of  
58 hematological malignancies in independent cohorts of XP-C patients (Oetjen et al.,  
59 2019; Sarasin et al., 2019) which demonstrated mainly myelodysplastic syndrome  
60 with secondary acute myeloid leukemia manifestation. The genetic mechanism of  
61 increased risk of internal tumors in XP patients is not well understood.

62 Experiments with animal XP-C models demonstrated high incidence of liver  
63 and lung cancer (Melis et al., 2008) as well as 30-fold increase of spontaneous  
64 mutation rate in *Hprt* gene in T-lymphocytes of 1 year old mice (Wijnhoven et al.,  
65 2000). Induction of oxidative stress has been shown to further increase the somatic  
66 mutagenesis in *Xpc*<sup>-/-</sup>-deficient mice with steady accumulation with age (Melis et  
67 al., 2013). A similar tumor-prone phenotype was observed in *Ddb2/Xpe* deficient  
68 mice with impaired GG-NER pathway: these animals developed broad spectrum of  
69 tumors with particularly high incidence of hematopoietic neoplasms (Yoon et al.,  
70 2005).

71 In this work we performed whole genome sequencing (WGS) of a unique  
72 collection of internal tumors from XP-C patients to demonstrate that the  
73 constitutive GG-NER deficiency causes mutator phenotype rendering  
74 susceptibility to hematological malignancies. A particular genomic mutational  
75 signature explains the majority of mutations in the studied XP-C leukemia and  
76 sarcomas. Observed mutational profiles indicate that mutational process is  
77 associated with lesions formed from purine bases. This is the first work which  
78 explores mutational patterns in XP-C patients beyond cutaneous malignancies  
79 genome-wide.

80

81

82

## 83 RESULTS

84 We sequenced whole genomes of 6 myeloid leukemia, 1 uterine  
85 rhabdomyosarcoma and 1 breast sarcoma along with paired normal tissues from  
86 unrelated patients, representing XP-C, the most frequent group of XP in the  
87 Northern Africa and Europe (Soufir et al., 2010) and created a catalogue of 202467  
88 somatic mutations (Table 1). Seven out of eight samples harbored a founder  
89 c.1643\_1644 delTG mutation characteristic of given XP-C population (Soufir et  
90 al., 2010) (Table 1). The patients developed internal tumors early in life, between  
91 12 and 30 years of age (median age of tumor diagnosis - 24 years, Table 1). XP-C  
92 cancers contained somatic copy number aberrations (SCNAs) and mutations which  
93 are characteristic for corresponding types of sporadic malignancies: mutations in  
94 *TP53* and deletions of chromosomes 5 and 7 in leukemia, biallelic loss of  
95 *CDKN2A* in breast cancer and highly unstable genome of rhabdomyosarcoma  
96 (Supplementary Table 1).

97 We identified 14.5-31.2 (mean 24.6) fold increase in the number of somatic  
98 mutations in XP-C leukemia samples relative to the sporadic myeloid neoplasms  
99 (Mann–Whitney U test, two-sided,  $P = 5.8e-05$ ) and the absence of such an effect  
100 for XP-C sarcomas (Fig. 1a). This effect was consistent for single base  
101 substitutions (SBS), small indels (ID) and double base substitutions (DBS, Fig 1a).

102 The genomic mutational profiles in XP-C tumors were similar between each  
103 other irrespectively of the tumor type (average pairwise Cosine similarity of 0.964  
104 (from 0.886 to 0.998)) (Figs. 1b, c;Supplementary Fig. 1, Supplementary Tables  
105 3,4,5) but were different from tissue-matched sporadic tumors (Fig 1b,c). The  
106 distinct grouping of XP-C tumors based on mutational profiles was further  
107 confirmed in the context of 190 sporadic tissue-matched cancers by  
108 Multidimension Scaling analysis (Fig 1b). The mutational patterns of indels was  
109 dominated by single nucleotide deletions of C:G and T:A bases in homopolymer  
110 stretches and dinucleotide deletions in repeats (Supplementary Fig. 1b). The

111 dinucleotide substitutions were not overrepresented by specific classes and  
112 demonstrated a broad range of contexts (Supplementary Fig. 1c).

113 To better understand mutational processes operating in XP-C cancers we  
114 extracted mutational signatures from XP-C and sporadic tissue-matched tumors  
115 with the non-negative matrix factorization approach (Alexandrov et al., 2013a)  
116 (NMF). Seven signatures were extracted from this dataset (Supplementary Figs.  
117 2a,b) and one of them, Signature “C” explained on average 83.1% of mutations in  
118 the XP-C samples (57% in breast sarcoma, 88.9% in rhabdomyosarcoma and 84.1-  
119 88.7% in leukemia) while in sporadic tumors only small contribution (average  
120 9.7%, range 0-34.3%) of signature “C” was observed (Figs. 2a,b., Supplementary  
121 Figs. 2c,d).

122 These seven extracted signatures (A to G) together with original XP-C  
123 mutational profiles were compared with COSMIC mutational signatures  
124 (Alexandrov et al., 2013b) and mutational profiles of organoids from human *XPC*  
125 and mouse *Ercc1* knockouts (Jager et al., 2019) using unsupervised clustering.  
126 This analysis revealed that the XP-C tumor mutational profiles and their NMF-  
127 derived mutational Signature “C” had the highest similarity to the COSMIC  
128 Signature 8 (cosine similarity of 0.87 – 0.92, and 0.86 respectively) and formed a  
129 cluster together with *XPC* and *Ercc1* organoid knockouts (Fig. 2c., Supplementary  
130 Fig. 2e). At the same time the Signature “C” was different from Signature 8 by  
131 strong transcriptional asymmetry, increased mutations from C and decreased  
132 mutations from T (1.24 and 1.43 fold respectively) specifically in excess of  $VpCpT$   
133  $> D$  and  $NpCpT > T$  (where V designates A,C,T and D – A,G,T; Fig. 2a).

134 A mutational process associated with XPC-deficiency is expected to  
135 demonstrate asymmetry between the transcribed and untranscribed strands of a  
136 gene (transcriptional bias: TRB) (Zheng et al., 2014). This may be associated with  
137 excess of unrepaired bulky lesions on the untranscribed strand due to impaired  
138 GG-NER while on the transcribed strand such lesions would be effectively  
139 repaired by TC-NER (Haradhvala et al., 2016). Indeed, transcriptional strand bias  
140 in XP-C was strong and highly significant for all six classes of nucleotide

141 substitutions grouped by the reference and mutated nucleotide, while in tissue-  
142 matched sporadic cancers it was weak or absent (Fig. 3a,b,c,e., Supplementary Fig.  
143 3a,b,c). Moreover, the strongest transcriptional bias was detected in highly  
144 expressed genes of XP-C tumors, reaching 7.34-fold, (Wilcoxon signed-rank test,  
145 two-sided,  $P = 2.91e-11$ ) in XP-C leukemia (Fig. 3c., Supplementary Fig. 3d).

146 These effects could be explained by either excess of mutations from  
147 damaged pyrimidines or decrease of mutations from damaged purines on the  
148 transcribed (noncoding) strand. Both phenomena were previously described (see  
149 Haradhvala et al., 2018) and refer to Transcription-coupled Damage (TCD) or  
150 Transcription-coupled repair (TCR). In case of TCD the increase of mutation rates  
151 in gene as compared to intergenic region should be observed (TCD in liver cancer  
152 analysis in Haradhvala et al., 2018) while in case of TCR we can expect the  
153 decrease of mutation rates in gene as compared to intergenic regions. In order to  
154 discriminate between these two possibilities a comparison between mutation rates  
155 in intergenic and genic regions separately for purines and pyrimidines can be  
156 performed. To validate the suspected effect of TC-NER (decrease of mutations  
157 from purines on the transcribed strand), we performed two analysis. First, we  
158 compared relative signature contributions on the transcribed and untranscribed  
159 strands of genes and observed strong depletion of the predominant in XP-C  
160 leukemia Signature “C” as well as increase of typical for sporadic leukemia  
161 Signatures “A” and “E” on the transcribed strand of genes (Fig. 3d). Second, we  
162 compared mutation rates separately on transcribed and untranscribed strands of  
163 genes with proximal intergenic regions and observed a strong and significant effect  
164 compatible with the decrease of mutations from purines on the transcribed strand  
165 (average 1.64 fold, Wilcoxon signed-rank test, two-sided,  $P = 1.694e-13$ ) while  
166 there was no significant difference of mutations from purines between intergenic  
167 regions and untranscribed strand ( $P = 0.4437$ ; conventional mutation  
168 representation depicts decrease of mutations from pyrimidines on the untranscribed  
169 strand; Fig. 3f, Supplementary Fig. 3e). In line with that, we observed no  
170 difference between mutations from purines on untranscribed strand and intergenic

171 regions at different replication times, while signature of repair of mutations from  
172 purines on transcribed strand was observed and was the strongest in early-  
173 replicating regions which are usually associated with active gene transcription  
174 (Cowie et al., 2014; Zheng et al., 2014) (Fig. 4a, Supplementary Fig. 4a). Similarly  
175 to SBS, transcriptional bias in DBS and ID indicated that the primary damage is on  
176 purine bases, specifically in CpC>ApD and single nucleotide deletion of C:G  
177 nucleotides (Fig. 3b, Supplementary Fig. 3b,c).

178         Recent report suggested that bulky DNA lesions on the lagging strand  
179 during DNA replication are more frequently converted into mutations than on the  
180 leading strand probably due to more frequent error-prone bypass by translesion  
181 synthesis (TLS) polymerases (Haradhvala et al., 2016; Seplyarskiy et al., 2018).  
182 Indeed, we found a strong replicational bias (average 1.38-fold of all six  
183 mutational classes in XP-C leukemia, Wilcoxon signed-rank test, two-sided,  $P =$   
184  $2.91e-11$ ) compatible with preferential bypass of purine DNA lesions by error-  
185 prone TLS polymerases on the lagging strand (Fig. 4b, Supplementary Fig. 4c) in  
186 XPC-deficient tumors.

187         TLS polymerases which are recruited to bypass a bulky lesion can also  
188 insert incorrect bases opposite to undamaged nucleotides near the lesion (Matsuda  
189 et al., 2001; Stone et al., 2012). Indeed, in all 8 XP-C tumors we observed  
190 statistically significant excess of clustered events as compared to the random  
191 distribution (Fig. 4c, Supplementary Fig. 5). In diploid genome regions of XP-C  
192 leukemia 0.3% of SBS formed 140 short clusters with distance between mutations  
193 inferior to 16bp and mean of 7 bp (Fig. 4c; Supplementary Fig. 5). Moreover, 6.56-  
194 fold more mutations, which occurred within a distance of 16bp from each other  
195 were co-localized on the same sequencing reads, indicating that clustered  
196 mutations affect the same allele and may be interconnected (Wilcoxon signed-rank  
197 test, two-sided,  $P = 0.031$ ). These results are compatible with the hypothesis of the  
198 existence of bulky DNA lesions which enter the S phase and get bypassed by error-  
199 prone translesion DNA synthesis polymerases (Seplyarskiy et al., 2018) in *XPC*-

200 deficient cells, while in *XPC*-proficient cells majority of these lesions may be  
201 repaired prior to replication in error-free manner.

202         Due to the absence of GG-NER we expected to observe strong difference in  
203 terms of mutation rates between transcribed and untranscribed strands, particularly  
204 in open chromatin and early replicating regions known to be actively transcribed  
205 while we expected no difference between untranscribed strand of genes and  
206 intergenic regions in heterochromatic regions (Zheng et al. 2014). In XP-C  
207 leukemia mutation load in regions of open chromatin was strongly depleted in  
208 early replicating regions and regions with active histone marks (H3K27ac (2.83  
209 fold), H3K36me3 (8.45 fold), H3K4me1 (2.72 fold)) for transcribed strands of  
210 genes (Figs. 4a,d). Similar but weaker trends were observed when only  
211 untranscribed strands of genes and intergenic regions were analyzed (Figs. 4a,d,  
212 Supplementary Fig. 4a). Mutation load was also enriched on the untranscribed  
213 strand of genes and intergenic regions with repressive histone marks (H3K27me3  
214 (1.26 and 1.09 fold), H3K9me3 (1.28 and 1.25 fold)) and in late replicating regions  
215 associated with heterochromatin (Figs. 4a,d). The observed patterns further  
216 confirm effectiveness of TC-NER on transcribed strand of genes in euchromatic  
217 regions while prove GG-NER being dysfunctional on both intergenic regions and  
218 untranscribed strands of genes all over the genome in XP-C samples. To assess the  
219 relative mutation rates in different chromatin state regions we compared XP-C  
220 leukemia samples and sporadic myeloid neoplasms. The analysis revealed more  
221 homogeneous mutation load across the different states in XP-C leukemia in  
222 comparison with sporadic leukemia as well as elevated mutation rates in  
223 heterochromatic regions relative to genic and regulatory elements (Supplementary  
224 Fig. 4b).

225         To further validate mutational consequences of *XPC* deficiency, we  
226 compared the mutational landscape of cutaneous squamous cell carcinomas  
227 (cSCC) from XP-C patients and sporadic tumors (Zheng et al. 2014). All cSCC  
228 tumors, independently of XP-C mutational status presented the typical UV-light  
229 induced signature (C>T mutations at YpC sites (where Y designates C or T),



230 85.6%, Supplementary Fig. 6a), which arises due to the bulky lesions on  
231 pyrimidines. However, in XP-C cSCCs there was remarkably more pronounced  
232 decrease of mutations from pyrimidines on the transcribed strand relative to  
233 untranscribed strand and intergenic regions, as well as much stronger transcriptional  
234 bias in highly expressed genes (Supplementary Fig. 6b, c). Moreover XP-C cSCC  
235 demonstrated stronger difference than sporadic cSCC between mutation rate on the  
236 transcribed strand of genes on the one side, and untranscribed strand of genes and  
237 intergenic regions on the other (Supplementary Fig. 6b, c, d). These differences  
238 were particularly strong in transcriptionally active early replicating regions  
239 (Supplementary Fig. 6d). In the case of XP-C internal tumors the observed patterns  
240 were similar with the only difference that the mutational profiles are compatible  
241 with mutations from purines (Figs. 3c,f; Fig. 4a).

242 In order to assess the timing of somatic mutations in XP-C tumors we  
243 selected the regions of somatic copy number alterations (SCNAs) where one allele  
244 was duplicated. We quantified the number of mutations which occurred before and  
245 after SCNA (Jolly and Van Loo, 2018) based on variant allele frequencies (n=2307  
246 mutations in 4 copy neutral LOH and 4 copy gains; Supplementary Table 2,  
247 Supplementary Fig. 7). On average 75% of mutations occurred before SCNAs  
248 suggesting that they may have accumulated in progenitor cells before  
249 tumorigenesis or early in tumor development (Wilcoxon signed-rank test, two-  
250 sided,  $P = 0.03906$ ; Fig. 5a). Therefore, the observed mutational burden and  
251 signature in XP-C tumor genomes may partially represent mutagenesis associated  
252 with lesion accumulation during the lifetime of normal body cells (Fig. 5b).

253

## 254 **DISCUSSION**

255 This described mutator phenotype may explain the increased risk of internal  
256 cancers in general and particularly for hematological malignancies in XP-C  
257 patients, which may be associated with relatively high rate of blood stem cell  
258 divisions (Tomasetti, 2016). Our results are in line with recent reports in human  
259 and mice showing that attenuated NER at germinal level is associated with

260 increased risk of lymphoma and sarcoma (Chan et al., 2017; Hyka-Nouspikel and  
261 Nouspikel, 2011).

262 The newly derived from XP-C cancers Signature “C” has the highest  
263 similarity to COSMIC Signature 8 which was originally extracted from sporadic  
264 tumors with the most elevated (but not usually exceeding 35%) fraction in  
265 sarcoma, medulloblastoma, lymphoma, chronic lymphocytic leukemia and breast  
266 cancer (Alexandrov et al., 2013b). While in some works, it was attributed to  
267 homology-repair deficiency (Ma et al., 2018; Waszak et al., 2018), recently in  
268 organoid models Signature 8 was associated with the nucleotide-excision repair  
269 deficiency (Jager et al., 2019). Comparison of the mutational profiles and NMF-  
270 extracted Signature “C” from XP-C internal tumors with the mutational profiles of  
271 human *XPC* and mouse *Ercc1* knockouts demonstrated high similarity between  
272 them highlighting the dysfunctional NER as the genetic basis of their common  
273 mutational process. Our work provides evidence that COSMIC Signature 8 is  
274 likely to result from mutagenesis associated with bulky lesions primarily repaired  
275 by NER and can be considered as a marker of attenuated NER function.

276 Taken together our results and previous reports demonstrate that NER-  
277 deficiency in different tissue types and in in-vitro models unmask a unique  
278 mutational process of similar etiology. A broad spectrum of nucleotide  
279 substitutions and deletions in XP-C context suggests the existence of a  
280 compendium of different bulky lesions induced by one or more genotoxins in DNA  
281 of somatic cells. The studied patients were diagnosed as XP-C at early age  
282 (median: 3 years) and were well protected from environmental mutagens during  
283 their life, therefore the observed mutagenesis could be caused by endogenous  
284 genotoxins which DNA lesions are almost fully repaired in *XPC*-proficient cells  
285 (Fig. 5b).

286 Future studies on the identification of nature of this mutational process and  
287 its link with particular genotoxins (for ex. free radicals, aldehydes, food mutagens)  
288 producing bulky lesions may result in elaboration of preventive measures for XP  
289 patients. Except the breast sarcoma sample from Comorian Archipelago with

290 IVS12 mutation, our dataset mainly represents a XP-C population of the Northern  
291 african origin and single *XPC* mutation (delTG) urging the importance of  
292 expanding the investigation of internal tumorigenesis and underlying mutagenesis  
293 in different XP populations.

294

295

## 296 **ACKNOWLEDGEMENTS**

297 S.N. was supported by grant Foundation ARC 2017, Foundation Gustave Roussy  
298 and Swiss Cancer League KFC-3985-08-2016. The authors would like to thank  
299 Dr. Patricia Kannouche and Dr. V. B. Seplyarskiy for fruitful discussions and  
300 participation, and Dr. F. Rajabi, Dr. Catherine Genestie and Dr. Samuel Quentin  
301 for DNA extraction and providing samples. The authors are also very thankful to  
302 Dr. C. Genestie (IGR, Villejuif, France), Dr. Z. Tata (Algiers, Algeria) and Dr. S.  
303 Duquenne and Dr. F. Cartault (Saint-Pierre, La Réunion, France) for giving us or  
304 for manipulating biopsies of tumors and Xiaole Xu (BGI) for perfect management  
305 of sequencing.

306

## 307 **AUTHOR CONTRIBUTIONS**

308 S.N., A.S. and A.A.Y. designed the study. A.S. and J.S. collected the samples.  
309 A.A.Y performed the data analysis and prepared figures. B.T.M participated in the  
310 data analysis. I.P performed data preprocessing. A.A.Y. and S.N. drafted  
311 manuscript. A.S. and J.S. commented manuscript. All authors contributed to the  
312 final version of the paper.

313

314

315

## 316 **MAIN TEXT TABLES AND FIGURES**

317

| Sample | Geographic familial origin | Homozygous <i>XPC</i> gene mutation <sup>a</sup> | Sex | Age at diagnosis | Diagnosis <sup>b</sup> | SBS | ID | DBS |
|--------|----------------------------|--------------------------------------------------|-----|------------------|------------------------|-----|----|-----|
|--------|----------------------------|--------------------------------------------------|-----|------------------|------------------------|-----|----|-----|

|         |                      |       |   |    |                                       |       |      |     |
|---------|----------------------|-------|---|----|---------------------------------------|-------|------|-----|
| SA009T1 | Spain                | delTG | F | 24 | RAEB-2, AML* with MDS-related changes | 36745 | 3147 | 235 |
| SA002T2 | Algeria              | delTG | F | 14 | Uterine Rhabdomyosarcoma*             | 5692  | 280  | 43  |
| SA006T2 | Algeria              | delTG | M | 29 | AML                                   | 33230 | 2322 | 198 |
| SA008T6 | Tunisia              | delTG | F | 24 | RAEB-1, RAEB-2, AML-6*                | 37783 | 2377 | 245 |
| SA012T2 | Morocco              | delTG | F | 29 | AML-6                                 | 33821 | 2575 | 160 |
| SA007T3 | Comorian Archipelago | IVS12 | F | 30 | Breast sarcoma*                       | 4787  | 451  | 34  |
| SA010T2 | Tunisia              | delTG | M | 16 | AML-6                                 | 17685 | 1722 | 99  |
| SA011T2 | Morocco              | delTG | M | 12 | T-ALL, RAEB-1, AML*                   | 17274 | 1464 | 98  |

318

319 **Table 1. Description of the studied XP-C tumors.**

320 a: delTG refers to c.1643\_1644 delTG; p.Val548AlafsX572 (Soufir et al., 2010),  
 321 IVS12 refers to the splice site mutation NM\_004628:exon13:c.2251-1G>C  
 322 (Cartault et al., 2011).

323 b: RAEB - Refractory Anemia with Excess Blasts, AML - Acute Myeloid  
 324 Leukemia, MDS - Myelodysplastic Syndrome, T-ALL - T-cell Acute  
 325 Lymphoblastic Leukemia.

326 \*Tumor samples used for genomic sequencing.

327

328 **Fig. 1 Mutational load and profiles of XP-C and 190 tissue-matched sporadic**  
 329 **cancers.**

330 a, Number of SBS (single base substitutions), DBS (double base substitutions) and  
 331 ID (indels) in XP-C and sporadic cancers with indicated SEM intervals. The  
 332 difference is highly significant for myeloid neoplasms (Mann–Whitney U test,  
 333 two-sided), but number of mutations in single samples of breast sarcoma and  
 334 rhabdomyosarcoma are in the range of sporadic tumors.

335 b, Multidimension scaling plot based on the Cosine similarity distance between the  
 336 mutational profiles of the samples. XP-C tumors clearly groups together and are  
 337 distant from tissue-matched sporadic cancers.

338 c, Trinucleotide-context mutational profiles (SEM intervals are shown in case of  
 339 multiple samples). X-axis represents the nucleotides upstream and downstream of

340 mutation. XP-C tumors demonstrate high similarity with each other (left panel),  
341 but profiles of sporadic cancers (right panel) are different from them.

342

343 **Fig. 2 Mutational profiles of XP-C tumors in the context of known mutational**  
344 **signatures.**

345 **a**, NMF-derived mutational Signature “C” from XP-C tumors and tissue-matched  
346 sporadic cancers in comparison with COSMIC Signature 8 (Alexandrov et al.,  
347 2013b) (Cosine similarity = 0.86).

348 **b**, Relative contribution of NMF-derived mutational signatures in XP-C and tissue-  
349 matched sporadic cancers (NMF approach). XP-C tumor mutational profiles are  
350 dominated by Signature “C”, while sporadic cancers by other signatures with  
351 relatively small proportion of Signature “C”.

352 **c**, Unsupervised hierarchical clustering based on the Cosine similarity distances  
353 between the XP-C tumors mutational profiles, NMF-derived mutational signatures  
354 from XPC tumors and tissue-matched sporadic cancers, COSMIC mutational  
355 signatures (Signatures 1-30), and *XPC* and *Ercc1* organoid knockouts (Jager et al.,  
356 2019). XP-C tumors cluster with each other and COSMIC Signature 8 forming a  
357 larger cluster with *Ercc1* and *XPC* organoid knockouts.

358

359 **Fig. 3 Strong transcriptional bias (TRB) is a specific feature of XP-C tumors.**

360 **a**, TRB is observed in the majority of trinucleotide contexts of XP-C leukemia  
361 samples (n=6, SEMs are indicated).

362 **b**, TRB is highly pronounced for specific single nucleotide C:G deletions in XP-C  
363 leukemia samples (n=6, SEMs are indicated).

364 **c**, TRB strength depends on the level of gene expression and is most pronounced in  
365 highly expressed genes (SEMs are indicated for leukemia; Poisson, two-sided test  
366 used for breast sarcoma (n=1) and rhabdomyosarcoma (n=1); Wilcoxon signed-  
367 rank, two-sided test for leukemia (n=6), *P* : ns – nonsignificant, \* < 0.5, \*\* < 0.01,  
368 \*\*\* < 0.001).

369 **d**, Relative mutational signature contribution for mutations separated by  
370 transcribed and untranscribed strands in transcriptionally active (FPKM > 2) and  
371 silent genes (FPKM < 0.05) of XP-C leukemia. Predominant in XP-C leukemia  
372 Signature “C” is depleted on the transcribed strands with functional TC-NER, but  
373 relative contribution of signatures “A” and “E” typical for sporadic leukemia is  
374 enriched on the transcribed strand (T-test, two-sided, paired between transcribed  
375 and untranscribed strands in expressed genes (n=6), *P*: ns – nonsignificant, \* < 0.5,  
376 \*\* < 0.01, \*\*\* < 0.001).

377 **e**, TRB is highly significant and pronounced in XP-C samples for all 6 substitution  
378 classes in comparison with sporadic cancers (Poisson two-sided test).

379 **f**, The strong TRB observed in XP-C cancers is caused by transcriptional-coupled  
380 repair (TC-NER) but not transcriptional-associated damage. Strong decrease of  
381 mutation rate is observed on the genic untranscribed strand for pyrimidines  
382 (transcribed for purines, red; right side of transcription start site, TSS), but not on  
383 the transcribed strand for pyrimidines (untranscribed for purines, blue) as  
384 compared to neighboring intergenic regions ( $\pm 50$  kbp from transcription start site).

385

386 **Fig. 4 Genomic landscape of mutagenesis in XP-C internal tumors.**

387 **a**, Mutational density on the transcribed, untranscribed DNA strands of genes as  
388 well in intergenic regions presented as a function of replication timing in XP-C  
389 leukemia. Replication time is split onto 5 quantiles. Mutation rate for pyrimidines  
390 on the transcribed strand (or purines on the untranscribed, blue) is not different  
391 from intergenic regions within the same bin, which is compatible with the absence  
392 of GG-NER.

393 **b**, Pyrimidine/purine ratios of mutation rates for regions of the genome grouped by  
394 propensity of reference DNA strand to be replicated as leading (left) or lagging  
395 (right) strand during DNA synthesis. Strong enrichment of mutagenesis on the  
396 leading strand from pyrimidines (C and T) (lagging strands from purines (G and  
397 A)) is observed for all 6 classes of mutations. Mutations from purines on the  
398 lagging DNA strand may result from error-prone Translesion Synthesis.

399 **c**, The assessment of the length of clustered mutation events on the distances  
400 ranging between 2 and 10000bp. Sliding window of 5bp was used to estimate  
401 median effect size (black) and its 95% interval (grey) as well as Bonferroni-  
402 corrected  $-\log_{10}$  ( $P$ -value) (red, Wilcoxon signed-rank test, two-sided) for  
403 different length of clusters in real data (XP-C leukemia,  $n=6$ ) against simulations  
404 (Methods section). The highest and significant enrichment of clustered mutations  
405 was observed for short clusters with lengths between 2 and 16 bp.

406 **d**, Intensity of epigenetic marks (5 quantiles) and relative mutation load.  
407 Mutational density on the transcribed, untranscribed DNA strands of genes as well  
408 in intergenic regions positively correlated with repressive histone marks  
409 H3K27me3 and H3K9me3, and inversely correlated with active chromatin marks  
410 (H3K27ac, H3K36me3, H3K4me1). For all three genomic categories, effect of the  
411 majority of epigenetic marks was similar. At the same time correlations of  
412 untranscribed strand for pyrimidines (or transcribed for purines, red) with  
413 H3K27me3 and H34M36me3 were more important than for the other two  
414 categories.

415

416 **Fig. 5 Accumulation of DNA lesions and mutations observed in XP-C tumors.**

417 **a**, Relative number of mutations which occurred before and after SCNAs in XP-C  
418 cancer genomes (normalized per haploid DNA copy number). The majority of  
419 events demonstrate an excess of mutations that were accumulated before the  
420 SCNA and may have occurred in tumor-progenitor cells or at early stages of  
421 carcinogenesis.

422 **b**, A model of DNA lesion accumulation and mutagenesis in XP-C cells. In XP-C  
423 cells where GG-NER is dysfunctional, bulky lesions cannot be efficiently repaired  
424 and persist everywhere in the genome except transcribed strands of active genes  
425 where TC-NER is operative. During the S-phase a part of bulky lesions on the  
426 leading strand may be removed by error-free template switching (TS) mechanisms  
427 while on the lagging strand they are converted to mutations by error-prone

428 translesion synthesis (TLS) more frequently, causing mutation accumulation with  
429 cell divisions and observed transcriptional and replication biases.

430

## 431 **SUPPLEMENTARY FIGURES AND TABLES**

432

433 **Supplementary Table 1. Information about samples used in the study.**

434

435 **Supplementary Table 2. Number of mutations occurred before and after**  
436 **SCNAs.**

437

438 **Supplementary Table 3. Matrix of single base substitutions (SBS) in different**  
439 **mutational classes.**

440

441 **Supplementary Table 4. Matrix of double base substitutions (DBS) in**  
442 **different mutational classes.**

443

444 **Supplementary Table 5. Matrix of indels (ID) in different mutational classes.**

445

446

447 **Supplementary Figure 1. Individual mutational profiles of XP-C tumors for**  
448 **different types of mutations.**

449 **a,** Single base substitutions (SBS).

450 **b,** Indels (ID).

451 **c,** Double base substitutions (DBS).

452

453 **Supplementary Figure 2. Non-negative Matrix Factorization-derived (NMF)**  
454 **mutational profiles and their contribution in XP-C and sporadic cancers.**

455 **a,** Factorization ranks of NMF and diagnostic plots. The model (K=7) was chosen  
456 based on the inflation of RSS (Residual Sum of Squares) and evar (explained  
457 variance achieved by a model).



- 458 **b**, Trinucleotide profiles of NMF-derived mutational signatures.
- 459 **c**, Relative contribution of the NMF-derived mutational signatures in XP-C tumors  
460 and sporadic tissue-matched samples (unsupervised hierarchical clustering, relative  
461 contribution was inferred using quadratic programming-based algorithm (Huang et  
462 al., 2018)). XP-C tumors group together, and their mutational profiles are  
463 characterized by high level of Signature “C”.
- 464 **d**, Bootstrapped estimation (10000 replications) of relative contribution of the  
465 NMF-derived signatures in XP-C tumors (quadratic programming-based  
466 algorithm). Signature “C” dominates in all the samples with very little level of  
467 variation and only in breast sarcoma sample (SA007T3) is slightly depleted.
- 468 **e**, Cosine similarity matrix between NMF-derived mutational signatures (A-G),  
469 COSMIC mutational signatures (Signatures 1-30), mutational profiles of XP-C  
470 tumors (SA00..), and *Ercc1* and *XPC* deficient organoid cultures.

471

472 **Supplementary Figure 3. Transcriptional bias (TRB) in XP-C tumors and**  
473 **sporadic cancers.**

- 474 **a**, Stranded mutational profiles of XP-C tumors in genic regions for single base  
475 substitutions (SBS). Canonical notation depicts mutations from pyrimidines (blue –  
476 transcribed for mutations from pyrimidines, untranscribed for mutations from  
477 purines; red – untranscribed for mutations from pyrimidines, transcribed for  
478 mutations from purines).
- 479 **b**, Stranded mutational profiles of XP-C tumors in genic regions for indels (ID).
- 480 **c**, Stranded mutational profiles of XP-C tumors in genic regions for double base  
481 substitutions (DBS).
- 482 **d**, TRB does not change significantly with the level of gene expression in sporadic  
483 tumors (SEM are indicated).
- 484 **e**, Relative mutation density for mutations from purines and pyrimidines in genic  
485 regions and neighboring intergenic regions of XP-C samples (SA007T3 and  
486 SA002T2, breast sarcoma and rhabdomyosarcoma respectively, Poisson two-sided  
487 test, *P*: ns – nonsignificant, \* < 0.5, \*\* < 0.01, \*\*\* < 0.001).

488

489 **Supplementary Figure 4. Genomic landscape of mutagenesis in XP-C internal**  
490 **tumors.**

491 **a**, Replication timing and intensity of mutagenesis on the transcribed and  
492 untranscribed DNA strands as well in intergenic regions of XP-C samples and  
493 tissue-matched sporadic cancers. The transcribed strand for pyrimidines (or  
494 untranscribed for purines, blue) behaves as intergenic regions genome-wide due to  
495 the absence of GG-NER in XP-C tumors (except breast sarcoma, with relatively  
496 low amount of Signature “C”) while this effect is very weak in sporadic cancers  
497 due to the different mutagenesis process and functional GG-NER.

498 **b**, Relative mutation rate in different chromatin states (ChromHMM) for XP-C  
499 leukemia and sporadic myeloid neoplasms.

500 **c**, Replication direction (leading and lagging) and relative intensity of mutagenesis  
501 (replication bias) in XP-C and tissue-matched sporadic tumors. Enrichment of the  
502 relative mutagenesis on the leading strand from pyrimidines (C and T) corresponds  
503 to the enrichment on the lagging strands from purines (G and A). For all six  
504 mutational classes we observe strong enrichment of mutations from purines on the  
505 lagging DNA strand of XP-C leukemia and rhabdomyosarcoma samples. The  
506 effect is evident but less pronounced in XP-C breast sarcoma. In sporadic cancers  
507 the effect is weak or work in opposite direction.

508

509 **Supplementary Figure 5. The assessment of the length of clustered mutation**  
510 **events for 1-500bp distances.**

511 Observed inter-mutation distance (red) is compared to the density distribution of  
512 30000 simulations (black) with similar number of mutations and trinucleotide  
513 contexts. Strong enrichment of clustered events is evident at short cluster distances  
514 in the all the samples.

515

516

517

518 **Supplementary Figure 6. Genomic mutational landscape of WT (n=7) and**  
519 **XP-C (n=5) cutaneous squamous cell carcinoma (cSCC) samples.**

520 **a**, Trinucleotide-context mutational profiles (SEM intervals are shown). X-axis  
521 represents the nucleotides upstream and downstream of mutation. The mutational  
522 profiles of both WT and XP-C cSCCs are dominated by C>T mutations at YpC  
523 sites (where Y designates C or T).

524 **b**, Relative mutation density for mutations from purines and pyrimidines in genic  
525 regions and neighboring intergenic regions of WT and XP-C cSCC samples.

526 **c**, TRB strength depends on the level of gene expression and is most pronounced in  
527 highly expressed genes (SEMs are indicated) specifically in XP-C cSCC samples.

528 **d**, Replication timing and intensity of mutagenesis on the transcribed and  
529 untranscribed DNA strands as well in intergenic regions of WT and XP-C cSCC  
530 samples. The untranscribed strand for pyrimidines (or transcribed for purines, red)  
531 behaves similar to intergenic regions genome-wide due to the absence of GG-NER  
532 in XP-C tumors while this effect is weaker in WT samples due to the different  
533 mutagenesis process and functional GG-NER.

534

535 **Supplementary Figure 7. Variant allele frequency distribution in SCNA**  
536 **regions of XP-C tumors.**

537

538

539

540

541

542

543

544

545

546

547

## 548 **METHODS**

549

### 550 **Studied samples**

551 Patients from the study were diagnosed with Xeroderma Pigmentosum at  
552 early age (median: 3.5 years (range 1.5-9 years); Table 1 and Supplementary Table  
553 1). Primary fibroblasts from sun-unexposed skin were used to determine the DNA  
554 repair deficiency by unscheduled DNA synthesis following UV-C irradiation as  
555 described (Sarasin et al., 1992). The XP genetic defect was characterized by  
556 complementation assay using recombinant retroviruses expressing wild type DNA  
557 repair genes (Arnaudeau-Bégard et al., 2003). The absence of the XPC protein was  
558 shown by Western blots (Cartault et al., 2011). The *XPC* mutation was determined  
559 by Sanger sequencing or whole exome sequencing. Informed signed consents were  
560 obtained from patients and/or their parents in accordance with the Declaration of  
561 Helsinki and the French law. This study was approved by the French Agency of  
562 Biomedicine (Paris, France), by the Ethics Committee from the CPP of  
563 Universitary Bordeaux Hospital (Bordeaux, France) and by the Institutional  
564 Review Board of the University Institute of Hematology (IUH: Saint-Louis  
565 Hospital, Paris). For patients with leukemia (n=6), tumoral bone marrow or  
566 peripheral blood mononucleated cells were separated on Fycoll-Hypaque. Cultured  
567 skin fibroblast cells were used as non-hematopoietic DNA controls in 5 out of 6  
568 patients. In the additional patient, bone marrow CD34+, CD14+ and CD3+ cells  
569 were sorted with magnetic beads; CD34+ CD14+ cells represented the leukemic  
570 fraction while CD3+ T lymphocytes, non-leukemic fraction was used as a control.  
571 DNA from solid tumors (SA002T2 and SA007T3) was extracted from FFPE  
572 blocks after examination and dissection by a pathologist. Tumor DNA was  
573 extracted from parts of FFPE containing more than 90% of tumor cells. Germline  
574 DNA was extracted from the non-tumoral part of FFPE (Supplementary Table 1).

### 575 **Genome sequencing and data processing**

576 The genomes were sequenced using BGISEQ-500 or Illumina Hiseq 2500  
577 (SA008T6) sequencers according to the manufacturer protocols to the mean

578 coverage after deduplication equal to 45x for tumor and 30x for normal DNA  
579 (Supplementary Table 1) using 100bp paired-end reads. Reads were mapped using  
580 BWA-MEM (v0.7.12) software (Li and Durbin, 2009) to the GRCh37 human  
581 reference genome and then used the standard GATK best practice pipeline (Van  
582 der Auwera et al., 2002) to process the samples and call somatic genetic variants.  
583 PCR duplicates were removed and base quality score recalibrated using GATK  
584 (Depristo et al., 2011) (v4.0.10.1), MarkDuplicates and BaseRecalibrator tools.  
585 Somatic SNVs and INDELS were called and filtered using GATK tools Mutect2,  
586 FilterMutectCalls and FilterByOrientationBias and annotated with oncotator  
587 (Ramos et al., 2015) (v1.9.9.0). SCNAs calling was done with FACETS (Shen and  
588 Seshan, 2016) (v 0.5.14). Quality controls of fastq and mapping were done with  
589 FASTQC (Andrews, 2015) (v0.11.7), samtools (Li et al., 2009) (v1.9), GATK  
590 HSMetrics, mosdepth (Pedersen and Quinlan, 2018) (v0.2.5) and multiqc (Ewels et  
591 al., 2016) (v1.5). All processing steps were combined in a pipeline built with  
592 snakemake (Köster and Rahmann, 2012) (v5.4.0).

593 The cutaneous squamous cell carcinoma samples (cSCC) from the work of  
594 Zheng et al. 2014 were downloaded as SRA files from the database of Genotypes  
595 and Phenotypes (dbGaP). The dataset was processed and filtered in the same way  
596 as XP-C leukemia samples.

### 597 **Filtration of somatic variants**

598 For XP-C leukemia samples from bone marrow biopsies we used additional  
599 filtration of the PASS variants which included requirement of at least 1 read on the  
600 both strands (F1R2.split(',').1 > 0 && F2R1.split(',').1 > 0 filters in GATK) and  
601 the variant allele frequency (VAF) minimal threshold equal to 0.05.

602 To avoid contamination of true variants by FFPE sequencing artefacts we  
603 used more stringent criteria for breast sarcoma (SA007T3) and rhabdomyosarcoma  
604 (SA002T2) samples which included at least 2 and 1 reads from each strand and  
605 minimal VAF equal to 0.3 and 0.4 for breast cancer and rhabdomyosarcoma  
606 samples respectively. These thresholds were chosen empirically taking into

607 account the high purity/ploidy of the samples (Supplementary Table 1) and VAF of  
608 FFPE artefacts which can vary between 0.01 and 0.15 (Robbe et al., 2018).

609 Additionally, all used VCF files were filtered based on the alignability map  
610 of human genome (Derrien et al., 2012) from UCSC browser (Kent et al., 2002)  
611 (<https://genome.ucsc.edu/cgi-bin/hgFileUi?db=hg19&g=wgEncodeMapability>)  
612 with the length of K-mer equal to 75bp (wgEncodeCrgMapabilityAlign75mer,  
613 mutations overlapped regions with score < 1 were filtered out) and UCSC Browser  
614 blacklisted regions (Duke and DAC).

### 615 **Mutational signatures analysis**

616 To convert the VCF files into a catalog of mutational matrixes we used the  
617 MutationalPatterns software v.1.11.0 (Blokzijl et al., 2018). Profiling of the  
618 mutational matrixes of indels and double nucleotides substitutions was performed  
619 with SigProfilerMatrixGenerator v.1.0 software (Bergstrom et al., 2019).

620 For comparison with XP-C tumors we used 190 tissue-matched whole  
621 cancer genomes from the ICGC PCAWG collection (Yung et al., 2017) which  
622 included cancers from the following projects: Chronic Myeloid Disorders – UK  
623 (n=57), Acute Myeloid Leukaemia – KR (n=8), Breast Cancer TCGA US (n=91),  
624 Sarcoma - TCGA US (n=34). We used only high-quality variants and additionally  
625 filtered out mutations in low-mappability and blacklisted regions of the human  
626 genome.

627 To construct the multidimension scaling plot (MDS) we computed pairwise  
628 Cosine similarity distance between all pairs of the samples using  
629 MutationalPatterns package (Blokzijl et al., 2018) and then processed the matrix of  
630 distances between the samples in prcomp () function in R.

631 To perform Non-negative Matrix Factorization approach and extract de novo  
632 mutational signatures we used the XP-C samples along with tissue-matched dataset  
633 of PCAWG samples (n = 190) in NMF framework realized in MutatioanlPatterns  
634 R package (Blokzijl et al., 2018) with 500 initialization runs. After examination of  
635 the diagnostic plots (Supplementary Fig. 2a) we choose K=7 (with RSS at inflation  
636 point, according to Hatchins et al. (Hutchins et al., 2008)) to extract mutational

637 signatures (Supplementary Figs. 2b) and then assigned them to the known  
638 mutational signatures based on the Cosine similarity (Fig. 2c, Supplementary Fig.  
639 2e). Choosing of lower (K=4) or higher factorization rank (K=9) did not influence  
640 significantly the extracted Signature “C” and its proportion in samples (data not  
641 shown).

642 To quantify the contribution of the NMF-derived mutational signatures (A-  
643 G) in XP-C tumors and tissue-matched PCAWG cancers we used the quadratic  
644 programming-based algorithm (Huang et al., 2018) realized in SigsPack R package  
645 (Schumann et al., 2019) (Fig. 2b). To better understand and quantify the  
646 contribution of the NMF-derived mutational signatures in XP-C dataset we  
647 additionally used bootstrapping (n=10000) on substitution classes to receive the  
648 confidence intervals of each signature contribution (Supplementary Fig. 2d)

#### 649 **Transcriptional strand bias analysis**

650 Transcriptional strand bias (TRB) was quantified for each sample and six  
651 mutational classes using MutationalPatterns package (Blokzijl et al., 2018). The  
652 function computed inequality between mutations from pyrimidines (C>A,T,G;  
653 T>A,C,G) to mutations from purines (G>A,C,T; A>C,G,T) for genes located on  
654 the sense and antisense strands of DNA relative to the reference human genome.  
655 Inequality in number of mutations from purines and pyrimidines was considered as  
656 evidence of transcriptional bias and statistical significance was assessed using  
657 Poisson test.

658 To compute tissue-specific TRB between genes expressed at low and high  
659 level we used RPKM values of RNA-seq from Epigenetic Roadmap Project  
660 (Consortium et al., 2015) (E028 for breast sarcoma, E050 for leukemia, E100 for  
661 rhabdomyosarcoma). For each gene mutations were separated as located on  
662 transcribed or untranscribed strands and genes were divided into bins by the level  
663 of expression (RPKMs: 0-0.1,0.1-1,1-10,10-20000 for leukemia; 0-0.1,0.1-20000  
664 for breast sarcoma and rhabdomyosarcoma). The significance for each bin was  
665 assessed using Poisson test, two-sided (single samples of breast sarcoma and  
666 rhabdomyosarcoma) or Wilcoxon signed-rank test, two-sided (leukemia, n=6) and

667 then for visualization the number of mutations were normalized by the total length  
668 of genes in each bin.

669       Following the hypothesis that majority of mutations were caused by purine  
670 DNA lesions we were able to compute strand-specific mutation densities around  
671 transcription start sites (TSSs). Transcribed and untranscribed strands of genes as  
672 well as 5' adjacent to TSS intergenic regions were treated separately. TSSs of all  
673 annotated genes (GENECODE v30 (Frankish et al., 2019)) were retrieved using  
674 BEDTools v2.29.0 (Quinlan, 2014) and then regions located  $\pm$  50kb of TSSs were  
675 split into 1kb intervals. The 1kb intervals which overlapped with other intergenic  
676 or genic intervals (represented mainly by overlapped or closely located genes)  
677 were removed. This approach rendered 237 Mbp of 5' proximal to TSS intergenic  
678 regions and 151 Mbp of genic regions.

### 679 **Replication timing**

680       We used repliseq data from 12 cell lines (Hansen et al., 2010; Thurman et  
681 al., 2007) to calculate consensus replication timing regions. For each 1kb regions  
682 we calculated standard deviation between all the cell lines and removed all regions  
683 with standard deviation higher than 15. For the rest of consistent regions across  
684 different cell lines we calculated mean values and used them during analysis. The  
685 genome was divided into 5 bins (10-25,25-40,40-55,55-70,70-85) according to the  
686 replication timing values and mutational density was calculated for each bin  
687 adjusting for the length of each region. We computed dependence of mutational  
688 density on replication timing independently for genic and intergenic regions  
689 separating mutations on transcribed strand and untranscribed strands.

### 690 **Epigenetic marks and mutational density**

691       To infer relationship between mutation density and intensity of various  
692 epigenetic marks (methylation, H3K27ac, H3K27me3, H3K36me3, H3K4me1,  
693 H3K9me3) we downloaded bigwig files of the Roadmap Epigenomics Project  
694 (Consortium et al., 2015) and converted them to wig and then bed files (tissue  
695 E050). The mean intensity of each mark was calculated for 1kb nonoverlapping  
696 windows across autosomes with BEDOPS v2.4.37 (bedmap) software (Neph et al.,



697 2012). We used only genomic windows with high alignability (equal to 1) along at  
698 least 90% of a window. Mark intensities were normalized to 1-100 range. For each  
699 window we split mark intensities into 5 quantiles (cut2() function in R (R  
700 Development Core Team, 2011)) and calculated relative mutation density of each  
701 mark for intergenic regions, transcribed and untranscribed strands of genes.

702 The ChromHMM Expanded 18-state models of chromatin states (E050)  
703 were downloaded as bed file (Consortium et al., 2015) and all the windows with  
704 the highest alignability spanning less than 90% of the window were filtered out.  
705 Then we calculated relative mutation density for each sample and chromatin state  
706 for XP-C leukemia and sporadic myeloid neoplasms.

### 707 **Replicational strand bias**

708 We used data from Okazaki-seq experiments data (Petryk et al., 2016) for  
709 GM06990 and HeLa cell lines to infer the regions of genome preferentially  
710 replicating as lagging or leading strand relative to the reference human genome.  
711 1kbp genomic regions for which values representing direction of replication fork  
712 differed between cell lines more than 0.4 were removed. We calculated ratio of the  
713 densities between mutations from pyrimidines (C, T) and purines (G, A) for each  
714 bin (-1 - 0.5, -0.5 - 0, 0 - 0.5, 0.5 - 1) of the preferential replication direction  
715 (negative values correspond to genomic regions where reference strand is  
716 replicated as lagging strand; and positive values – as leading) similar to the  
717 methodology of Seplyarsky et al. (Seplyarskiy et al., 2016)

### 718 **Clustered mutations**

719 To evaluate the distribution of mutations across the genome for the presence  
720 of clustered mutations in our dataset, we performed Monte Carlo simulations for  
721 the intermutation distances distribution of random mutations for ranges between 2  
722 and 10000bp for each studied sample. We developed a mathematical model of the  
723 Monte Carlo method for random mutations generation based on the following  
724 statements: 1) positions of mutations are random and uniformly distributed along  
725 the genome; 2) random positions are selected from the same set of genomic  
726 intervals as original somatic mutations; 3) the number and nucleotide context

727 spectrum of randomly generated mutations exactly matches somatic mutations in  
728 the corresponding sample. As follows, our simulations are based on the discrete  
729 homogeneous Poisson point process. The Monte Carlo simulations were performed  
730 using Java programming language, discrete random positions were generated with  
731 standard Java Random class (Supplementary code). Data analysis was carried out  
732 with MathWorks MATLAB. We randomly assigned mutations giving their  
733 trinucleotide (3bp) contexts and repeated the procedure 30000 times for each  
734 sample (Supplementary Fig. 5).

735 To compute statistics for the distances between neighbors for randomly  
736 placed mutations within mapability sections for chromosomes and whole genome  
737 we used the following algorithm:

738

```
739 1: input:  $G$            ▶ mappable sections of genome  
740 2: input:  $S$            ▶ desired statistics of nucleotide contexts  
741 3: input:  $N$            ▶ total number of simulations  
742 4: input:  $D$            ▶ maximal allowed distance between mutations  
743 5: output:  $M \leftarrow \{\emptyset\}$  ▶ empty set for randomly generated mutations  
744 6: output:  $O \leftarrow \{\emptyset\}$  ▶ empty set for distance statistics  
745 7: repeat  $N$  times  
746 8:   while size of  $M$  is less than size of  $S$   
747 9:     select random position  $p$  inside  $G$   
748 10:    determine nucleotide context  $x$  for  $p$   
749 11:    if count of  $x$  in  $M$  is less than in  $S$   
750 12:      append  $p$  to  $M$   
751 13:    end if  
752 14:  end while  
753 15:  sort  $M$   
754 16:  for every position  $p$  in  $M$  except last  
755 17:    compute distance  $d$  between  $p$  and next position in  $M$   
756 18:    if  $d \leq D$   
757 19:      append  $d$  into  $O$   
758 20:    end if  
759 21:  end for  
760 22:  output  $M$   
761 23:  output  $O$   
762 24: end repeat
```

763

764 We next verified that random mutations at small distances produced by  
765 random generations followed the Poisson distribution. Then, the means for  
766 simulated distributions were compared with the observed intermutation distances

767 for XP-C leukemia samples (n=6) using Wilcoxon signed-rank, two-sided test in  
768 5bp overlapping (1bp step) windows to define length of clusters (for 2-10000bp  
769 intervals). Resulted P-values were corrected with Bonferroni approach. Significant  
770 enrichment of clustered mutations at short distances remained when simulations  
771 were performed without taking into account the context of mutations or in 5-bp  
772 context of mutations; or when only euploid parts of the genomes were taken into  
773 account (data not shown). 4 exomes of XP-C samples were independently  
774 sequenced on Illumina Hiseq 2500 with ~100X sequence coverage. Out of 6  
775 clusters that overlapped exonic regions all 6 were validated. Additionally, we  
776 assessed the number of mutations located on the same read or different reads for  
777 clusters up to 16 bp located in diploid genomic regions.

#### 778 **Relative number of mutations before and after SCNAs**

779 To infer relative number of mutations which occurred before and after  
780 SCNA we followed to the previously described methodology (Jolly and Van Loo,  
781 2018) and identified SCNA of two classes in our dataset: copy gain or cnLOH  
782 (Supplementary Table 2). In these SCNA regions taking into account tumor purity  
783 and ploidy of the regions we determined conservative variant allele frequency  
784 (VAF) thresholds to separate mutations on occurred before and after SCNA given  
785 their VAF. The number of mutations was then normalized per haploid copy of a  
786 genomic segment.

787

#### 788 **DATA AVAILABILITY**

789 Experimental data generated in this study have been deposited to the European  
790 Genome-phenome Archive (EGA) accession XXX.

#### 791 **CODE AVAILABILITY**

792 All software used is published and/or in the public domain. Custom Java code for  
793 the clustered mutation analysis is available as the Supplementary code.

794

795

#### 796 **REFERENCES**

797

798 Alexandrov, L.B., Nik-Zainal, S., Wedge, D.C., Campbell, P.J., and Stratton, M.R.  
799 (2013a). Deciphering Signatures of Mutational Processes Operative in Human  
800 Cancer. *Cell Rep.* 3, 246–259.

801

802 Alexandrov, L.B., Nik-Zainal, S., Wedge, D.C., Aparicio, S.A.J.R., Behjati, S.,  
803 Biankin, A. V., Bignell, G.R., Bolli, N., Borg, A., Børresen-Dale, A.L., et al.  
804 (2013b). Signatures of mutational processes in human cancer. *Nature* 500, 415–  
805 421.

806

807 Andrews, S. (2015). FASTQC A Quality Control tool for High Throughput  
808 Sequence Data. Babraham Inst.

809

810 Arnaudeau-Bégard, C., Brellier, F., Chevallier-Lagente, O., Hoeijmakers, J.,  
811 Bernerd, F., Sarasin, A., and Magnaldo, T. (2003). Genetic correction of DNA  
812 repair-deficient/cancer-prone xeroderma pigmentosum group C keratinocytes.  
813 *Hum. Gene Ther.*

814

815 Van der Auwera, G.A., Carneiro, M.O., Hartl, C., Poplin, R., Del Angel, G., Levy-  
816 Moonshine, A., Jordan, T., Shakir, K., Roazen, D., Thibault, J., et al. (2002).  
817 GATK Best Practices. *Curr. Protoc. Bioinformatics.*

818

819 Bergstrom, E.N., Huang, M.N., Mahto, U., Barnes, M., Stratton, M.R., Rozen,  
820 S.G., and Alexandrov, L.B. (2019). SigProfilerMatrixGenerator: a tool for  
821 visualizing and exploring patterns of small mutational events. *BMC Genomics* 20,  
822 1–12.

823

824 Blokzijl, F., Janssen, R., van Boxtel, R., and Cuppen, E. (2018).  
825 MutationalPatterns: Comprehensive genome-wide analysis of mutational  
826 processes. *Genome Med.*

827

828 Bradford, P.T., Goldstein, A.M., Tamura, D., Khan, S.G., Ueda, T., Boyle, J., Oh,  
829 K.S., Imoto, K., Inui, H., Moriwaki, S.I., et al. (2011). Cancer and neurologic  
830 degeneration in xeroderma pigmentosum: Long term follow-up characterises the  
831 role of DNA repair. *J. Med. Genet.*

832

833 Cartault, F., Nava, C., Malbrunot, A.C., Munier, P., Hebert, J.C., N'guyen, P.,  
834 Djeridi, N., Pariaud, P., Pariaud, J., Dupuy, A., et al. (2011). A new XPC gene  
835 splicing mutation has lead to the highest worldwide prevalence of xeroderma  
836 pigmentosum in black Mahori patients. *DNA Repair (Amst).*

837

838 Chan, S.H., Lim, W.K., Ishak, N.D.B., Li, S.T., Goh, W.L., Tan, G.S., Lim, K.H.,  
839 Teo, M., Young, C.N.C., Malik, S., et al. (2017). Germline Mutations in Cancer  
840 Predisposition Genes are Frequent in Sporadic Sarcomas. *Sci. Rep.* 7, 1–8.

841

842 Consortium, R.E., Kundaje, A., Meuleman, W., Ernst, J., Bilenky, M., Yen, A.,  
843 Heravi-Moussavi, A., Kheradpour, P., Zhang, Z., Wang, J., et al. (2015).  
844 Integrative analysis of 111 reference human epigenomes. *Nature* 518, 317–330.

845

846 Cowie, D.A., Nazarethi, J., and Story, D.A. (2014). Chromatin organization is a  
847 major influence on regional mutation rates in human cancer cells. *Anaesth.*  
848 *Intensive Care* 42, 310–314.

849

850 Depristo, M.A., Banks, E., Poplin, R., Garimella, K. V., Maguire, J.R., Hartl, C.,  
851 Philippakis, A.A., Del Angel, G., Rivas, M.A., Hanna, M., et al. (2011). A  
852 framework for variation discovery and genotyping using next-generation DNA  
853 sequencing data. *Nat. Genet.*

854

855 Derrien, T., Estellé, J., Sola, S.M., Knowles, D.G., Raineri, E., Guigó, R., and  
856 Ribeca, P. (2012). Fast computation and applications of genome mappability.

857 PLoS One.

858

859 Ewels, P., Magnusson, M., Lundin, S., and Källér, M. (2016). MultiQC:  
860 Summarize analysis results for multiple tools and samples in a single report.  
861 *Bioinformatics*.

862

863 Frankish, A., Diekhans, M., Ferreira, A.M., Johnson, R., Jungreis, I., Loveland, J.,  
864 Mudge, J.M., Sisu, C., Wright, J., Armstrong, J., et al. (2019). GENCODE  
865 reference annotation for the human and mouse genomes. *Nucleic Acids Res.*

866

867 Hadj-Rabia, S., Oriot, D., Soufir, N., Dufresne, H., Bourrat, E., Mallet, S.,  
868 Poulhalon, N., Ezzedine, E., Grandchamp, B., Taïeb, A., et al. (2013). Unexpected  
869 extradermatological findings in 31 patients with xeroderma pigmentosum type C.  
870 *Br. J. Dermatol.* *168*, 1109–1113.

871

872 Hansen, R.S., Thomas, S., Sandstrom, R., Canfield, T.K., Thurman, R.E., Weaver,  
873 M., Dorschner, M.O., Gartler, S.M., and Stamatoyannopoulos, J.A. (2010).  
874 Sequencing newly replicated DNA reveals widespread plasticity in human  
875 replication timing. *Proc. Natl. Acad. Sci. U. S. A.*

876

877 Haradhvala, N.J., Polak, P., Stojanov, P., Covington, K.R., Shinbrot, E., Hess,  
878 J.M., Rheinbay, E., Kim, J., Maruvka, Y.E., Braunstein, L.Z., et al. (2016).  
879 Mutational Strand Asymmetries in Cancer Genomes Reveal Mechanisms of DNA  
880 Damage and Repair. *Cell* *164*, 538–549.

881

882 Huang, X., Wojtowitz, D., and Przytycka, T.M. (2018). Detecting presence of  
883 mutational signatures in cancer with confidence. *Bioinformatics* *34*, 330–337.

884 Hutchins, L.N., Murphy, S.M., Singh, P., and Graber, J.H. (2008). Position-  
885 dependent motif characterization using non-negative matrix factorization.

886 *Bioinformatics*.

887

888 Hyka-Nouspikel, N., and Nouspikel, T. (2011). Nucleotide excision repair and B  
889 lymphoma: Somatic hypermutation is not the only culprit. *Cell Cycle*.

890

891 Jager, M., Blokzijl, F., Kuijk, E., Bertl, J., Vougioukalaki, M., Janssen, R.,  
892 Besselink, N., Boymans, S., de Ligt, J., Pedersen, J.S., et al. (2019). Deficiency of  
893 nucleotide excision repair is associated with mutational signature observed in  
894 cancer. *Genome Res.* 1067–1077.

895

896 Jerbi, M., Ben Rekaya, M., Naouali, C., Jones, M., Messaoud, O., Tounsi, H.,  
897 Nagara, M., Chargui, M., Kefi, R., Boussen, H., et al. (2016). Clinical,  
898 genealogical and molecular investigation of the xeroderma pigmentosum type C  
899 complementation group in Tunisia. *Br. J. Dermatol.* 174, 439–443.

900

901 Jolly, C., and Van Loo, P. (2018). Timing somatic events in the evolution of  
902 cancer. *Genome Biol.* 19, 1–9.

903

904 Kent, W.J., Sugnet, C.W., Furey, T.S., Roskin, K.M., Pringle, T.H., Zahler, A.M.,  
905 and Haussler, a. D. (2002). The Human Genome Browser at UCSC. *Genome Res.*

906

907 Köster, J., and Rahmann, S. (2012). Snakemake-a scalable bioinformatics  
908 workflow engine. *Bioinformatics*.

909

910 Kraemer, K.H. (1987). Xeroderma pigmentosum. Cutaneous, ocular, and  
911 neurologic abnormalities in 830 published cases. *Arch. Dermatol.*

912

913 Kraemer, K.H., Lee, M.M., Andrews, A.D., and Lambert, W.C. (1994). The Role  
914 of Sunlight and DNA Repair in Melanoma and Nonmelanoma Skin Cancer: The  
915 Xeroderma Pigmentosum Paradigm. *Arch. Dermatol.*

916

- 917 Lehmann, A.R., McGibbon, D., and Stefanini, M. (2011). Xeroderma  
918 pigmentosum. *Orphanet J. Rare Dis.* 6, 1–6.  
919
- 920 Li, H., and Durbin, R. (2009). Fast and accurate short read alignment with  
921 Burrows-Wheeler transform. *Bioinformatics* 25, 1754–1760.  
922
- 923 Li, H., Handsaker, B., Wysoker, A., Fennell, T., Ruan, J., Homer, N., Marth, G.,  
924 Abecasis, G., and Durbin, R. (2009). The Sequence Alignment/Map format and  
925 SAMtools. *Bioinformatics* 25, 2078–2079.  
926
- 927 Ma, X., Liu, Y., Liu, Y., Alexandrov, L.B., Edmonson, M.N., Gawad, C., Zhou,  
928 X., Li, Y., Rusch, M.C., John, E., et al. (2018). Pan-cancer genome and  
929 transcriptome analyses of 1,699 paediatric leukaemias and solid tumours. *Nature*  
930 555, 371–376.  
931
- 932 Matsuda, T., Bebenek, K., Masutani, C., Rogozin, I.B., Hanaoka, F., and Kunkel,  
933 T.A. (2001). Error rate and specificity of human and murine DNA polymerase  $\eta$ . *J.*  
934 *Mol. Biol.*  
935
- 936 Melis, J.P.M., Wijnhoven, S.W.P., Beems, R.B., Roodbergen, M., van den Berg,  
937 J., Moon, H., Friedberg, E., van der Horst, G.T.J., Hoeijmakers, J.H.J., Vijg, J., et  
938 al. (2008). Mouse Models for Xeroderma Pigmentosum Group A and Group C  
939 Show Divergent Cancer Phenotypes. *Cancer Res.* 68, 1347–1353.  
940
- 941 Melis, J.P.M., Kuiper, R. V., Zwart, E., Robinson, J., Pennings, J.L.A., van  
942 Oostrom, C.T.M., Luijten, M., and Van Steeg, H. (2013). Slow accumulation of  
943 mutations in *Xpc*<sup>-/-</sup> mice upon induction of oxidative stress. *DNA Repair (Amst).*  
944
- 945 Neph, S., Kuehn, M.S., Reynolds, A.P., Haugen, E., Thurman, R.E., Johnson,  
946 A.K., Rynes, E., Maurano, M.T., Vierstra, J., Thomas, S., et al. (2012). BEDOPS:



- 947 High-performance genomic feature operations. *Bioinformatics*.  
948
- 949 Oetjen, K.A., Levoska, M.A., Tamura, D., Ito, S., Douglas, D., Khan, S.G., Calvo,  
950 K.R., Kraemer, K.H., and DiGiovanna, J.J. (2019). Predisposition to hematologic  
951 malignancies in patients with xeroderma pigmentosum. *Haematologica*  
952 *haematol.2019.223370*.  
953
- 954 Pedersen, B.S., and Quinlan, A.R. (2018). Mosdepth: Quick coverage calculation  
955 for genomes and exomes. *Bioinformatics*.  
956
- 957 Petryk, N., Kahli, M., D'Aubenton-Carafa, Y., Jaszczyszyn, Y., Shen, Y., Silvain,  
958 M., Thermes, C., Chen, C.L., and Hyrien, O. (2016). Replication landscape of the  
959 human genome. *Nat. Commun.* 7, 1–13.  
960
- 961 Quinlan, A.R. (2014). BEDTools: The Swiss-Army tool for genome feature  
962 analysis. *Curr. Protoc. Bioinforma.*  
963
- 964 R Development Core Team, R. (2011). R: A Language and Environment for  
965 Statistical Computing.  
966
- 967 Ramos, A.H., Lichtenstein, L., Gupta, M., Lawrence, M.S., Pugh, T.J., Saksena,  
968 G., Meyerson, M., and Getz, G. (2015). Oncotator: Cancer variant annotation tool.  
969 *Hum. Mutat.*  
970
- 971 Robbe, P., Popitsch, N., Knight, S.J.L., Antoniou, P., Becq, J., He, M., Kanapin,  
972 A., Samsonova, A., Vavoulis, D. V., Ross, M.T., et al. (2018). Clinical whole-  
973 genome sequencing from routine formalin-fixed, paraffin-embedded specimens:  
974 pilot study for the 100,000 Genomes Project. *Genet. Med.*  
975
- 976 Sarasin, A., Blanchet-Bardon, C., Renault, G., Lehmann, A., Arlett, C., and

- 977 Dumez, Y. (1992). Prenatal diagnosis in a subset of trichothiodystrophy patients  
978 defective in DNA repair. *Br. J. Dermatol.*
- 979
- 980 Sarasin, A., Quentin, S., Droin, N., Sahbatou, M., Saada, V., Auger, N., Boursin,  
981 Y., Dessen, P., Raimbault, A., Asnafi, V., et al. (2019). Familial predisposition to  
982 TP53/complex karyotype MDS and leukemia in DNA repair-deficient xeroderma  
983 pigmentosum. *Blood.*
- 984
- 985 Schumann, F., Blanc, E., Messerschmidt, C., Blankenstein, T., Busse, A., and  
986 Beule, D. (2019). SigsPack, a package for cancer mutational signatures. *BMC*  
987 *Bioinformatics* 20, 1–9.
- 988
- 989 Seplyarskiy, V., Akkuratov, E.E., Akkuratova, N. V., Andrianova, M.A., Nikolaev,  
990 S.I., Bazykin, G.A., Adameyko, I., and Sunyaev, S.R. (2018). Error-prone bypass  
991 of DNA lesions during lagging strand replication is a common source of germline  
992 and cancer mutations. *BioRxiv* 200691.
- 993
- 994 Seplyarskiy, V.B., Soldatov, R.A., Popadin, K.Y., Antonarakis, S.E., Bazykin,  
995 G.A., and Nikolaev, S.I. (2016). APOBEC-induced mutations in human cancers  
996 are strongly enriched on the lagging DNA strand during replication. 1–9.
- 997
- 998 Sethi, M., Lehmann, A.R., Fawcett, H., Stefanini, M., Jaspers, N., Mullard, K.,  
999 Turner, S., Robson, A., McGibbon, D., Sarkany, R., et al. (2013). Patients with  
1000 xeroderma pigmentosum complementation groups C, e and v do not have abnormal  
1001 sunburn reactions. *Br. J. Dermatol.* 169, 1279–1287.
- 1002
- 1003 Shen, R., and Seshan, V.E. (2016). FACETS: Allele-specific copy number and  
1004 clonal heterogeneity analysis tool for high-throughput DNA sequencing. *Nucleic*  
1005 *Acids Res.* 44.
- 1006

- 1007 Soufir, N., Ged, C., Bourillon, A., Austerlitz, F., Chemin, C., Sary, A., Armier, J.,  
1008 Pham, D., Khadir, K., Roume, J., et al. (2010). A Prevalent Mutation with Founder  
1009 Effect in Xeroderma Pigmentosum Group C from North Africa. *J. Invest.*  
1010 *Dermatol.* *130*, 1537–1542.
- 1011
- 1012 Stone, J.E., Lujan, S.A., Kunkel, T.A., and Kunkel, T.A. (2012). DNA polymerase  
1013 zeta generates clustered mutations during bypass of endogenous DNA lesions in  
1014 *Saccharomyces cerevisiae*. *Environ. Mol. Mutagen.*
- 1015
- 1016 Thurman, R.E., Day, N., Noble, W.S., and Stamatoyannopoulos, J.A. (2007).  
1017 Identification of higher-order functional domains in the human ENCODE regions.  
1018 *Genome Res.*
- 1019
- 1020 Tomasetti (2016). Stem cell divisions, somatic mutations, cancer etiology, and  
1021 cancer prevention. *Int. Encycl. Public Heal.* *80*, 381–388.
- 1022
- 1023 Waszak, S.M., Northcott, P.A., Buchhalter, I., Robinson, G.W., Sutter, C.,  
1024 Groebner, S., Grund, K.B., Brugières, L., Jones, D.T.W., Pajtler, K.W., et al.  
1025 (2018). Spectrum and prevalence of genetic predisposition in medulloblastoma: a  
1026 retrospective genetic study and prospective validation in a clinical trial cohort.  
1027 *Lancet Oncol.* *19*, 785–798.
- 1028
- 1029 Wijnhoven, S.W.P., Kool, H.J.M., Mullenders, L.H.F., Van Zeeland, A.A.,  
1030 Friedberg, E.C., Van Der Horst, G.T.J., Van Steeg, H., and Vrieling, H. (2000).  
1031 Age-dependent spontaneous mutagenesis in Xpc mice defective in nucleotide  
1032 excision repair. *Oncogene* *19*, 5034–5037.
- 1033
- 1034 Yoon, T., Chakraborty, A., Franks, R., Valli, T., Kiyokawa, H., and  
1035 Raychaudhuri, P. (2005). Tumor-prone phenotype of the DDB2-deficient mice.  
1036 *Oncogene* *24*, 469–478.

1037

1038 Yung, C.K., O'Connor, B.D., Yakneen, S., Zhang, J., Ellrott, K.,  
1039 Kleinheinz, K., Miyoshi, N., Raine, K.M., Royo, R., Saksena, G.B., et al. (2017).  
1040 Large-Scale Uniform Analysis of Cancer Whole Genomes in Multiple Computing  
1041 Environments. *BioRxiv*.

1042

1043 Zheng, C.L., Wang, N.J., Chung, J., Moslehi, H., Sanborn, J.Z., Hur, J.S.,  
1044 Collisson, E.A., Vemula, S.S., Naujokas, A., Chiotti, K.E., et al. (2014).  
1045 Transcription Restores DNA Repair to Heterochromatin, Determining Regional  
1046 Mutation Rates in Cancer Genomes. *Cell Rep.* 9, 1228–1234.

1047

1048

1049

Figure 1

a

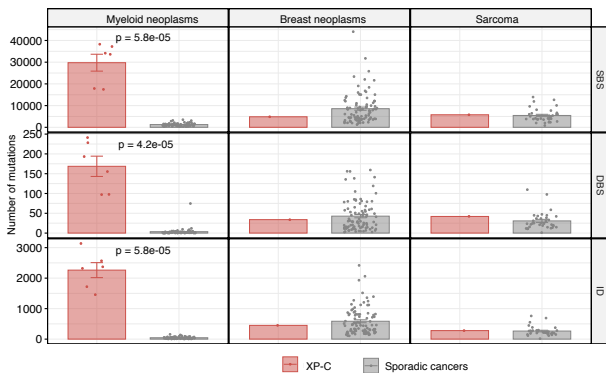

b

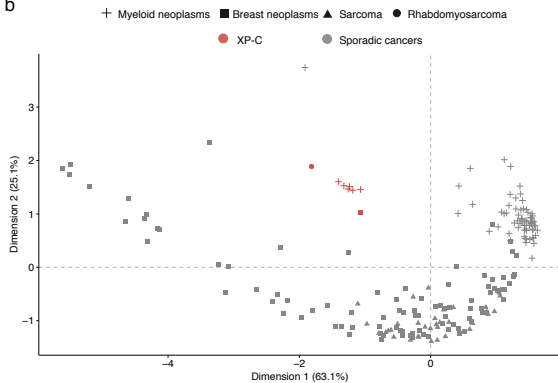

c

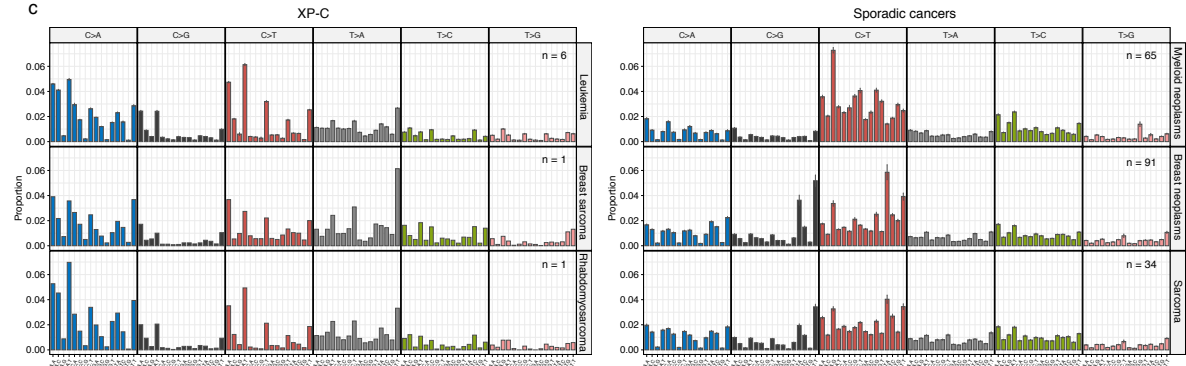

Figure 2 a

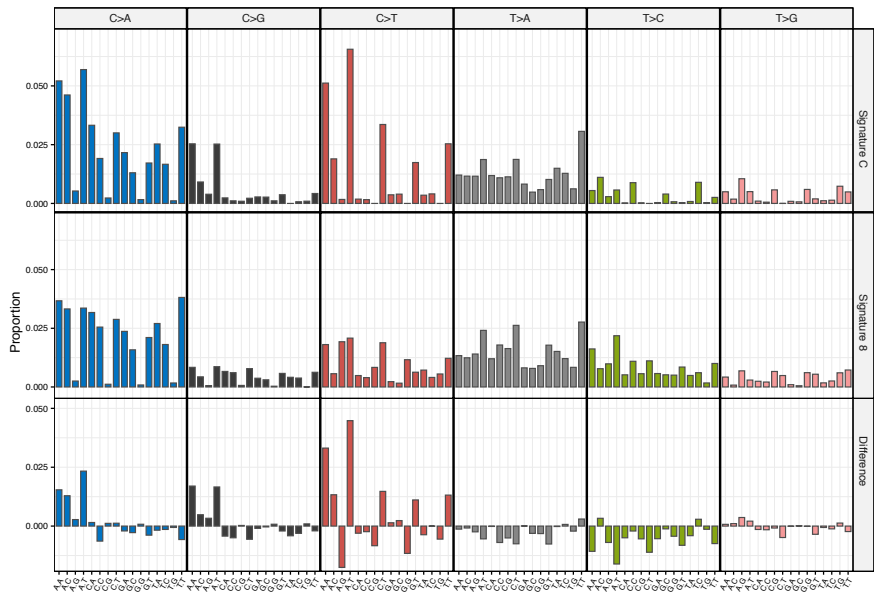

b

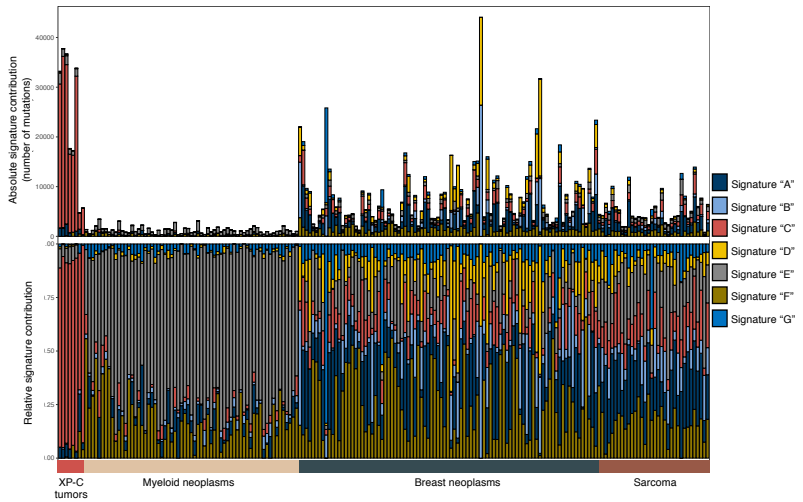

c

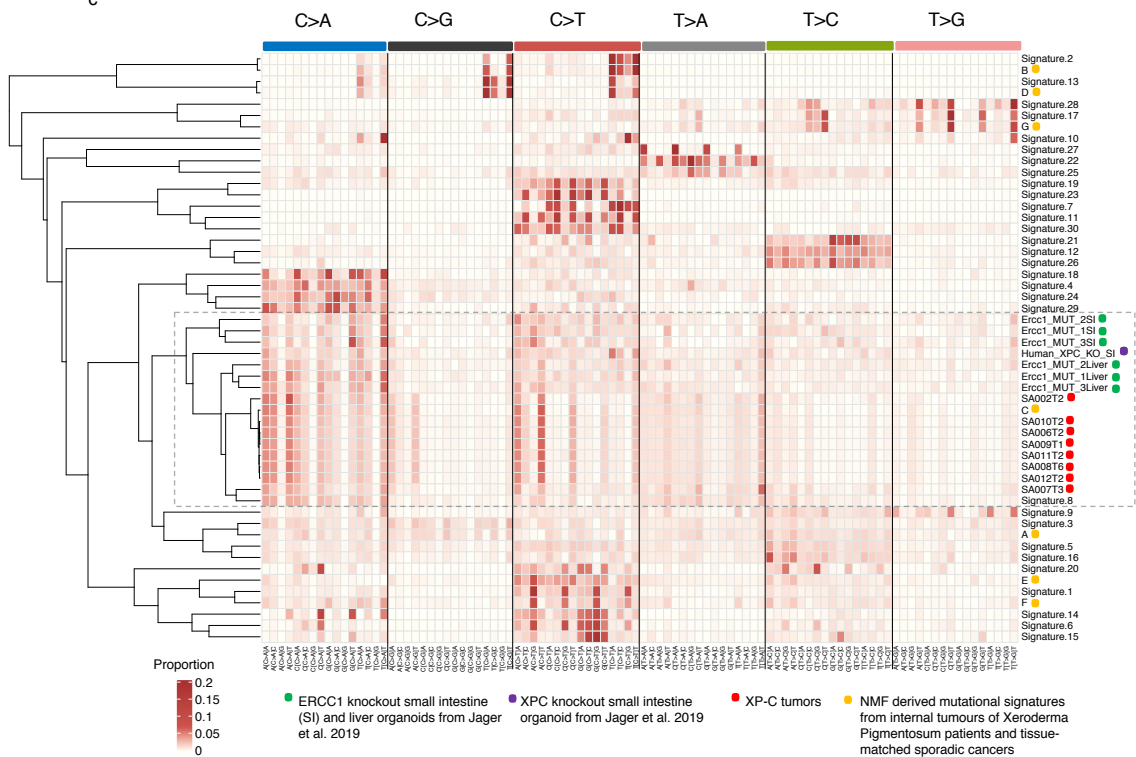

● ERCC1 knockout small intestine (SI) and liver organoids from Jager et al. 2019
 ● XPC knockout small intestine organoid from Jager et al. 2019
 ● XP-C tumors
 ● NMF derived mutational signatures from internal tumours of Xeroderma Pigmentosum patients and tissue-matched sporadic cancers

Figure 3

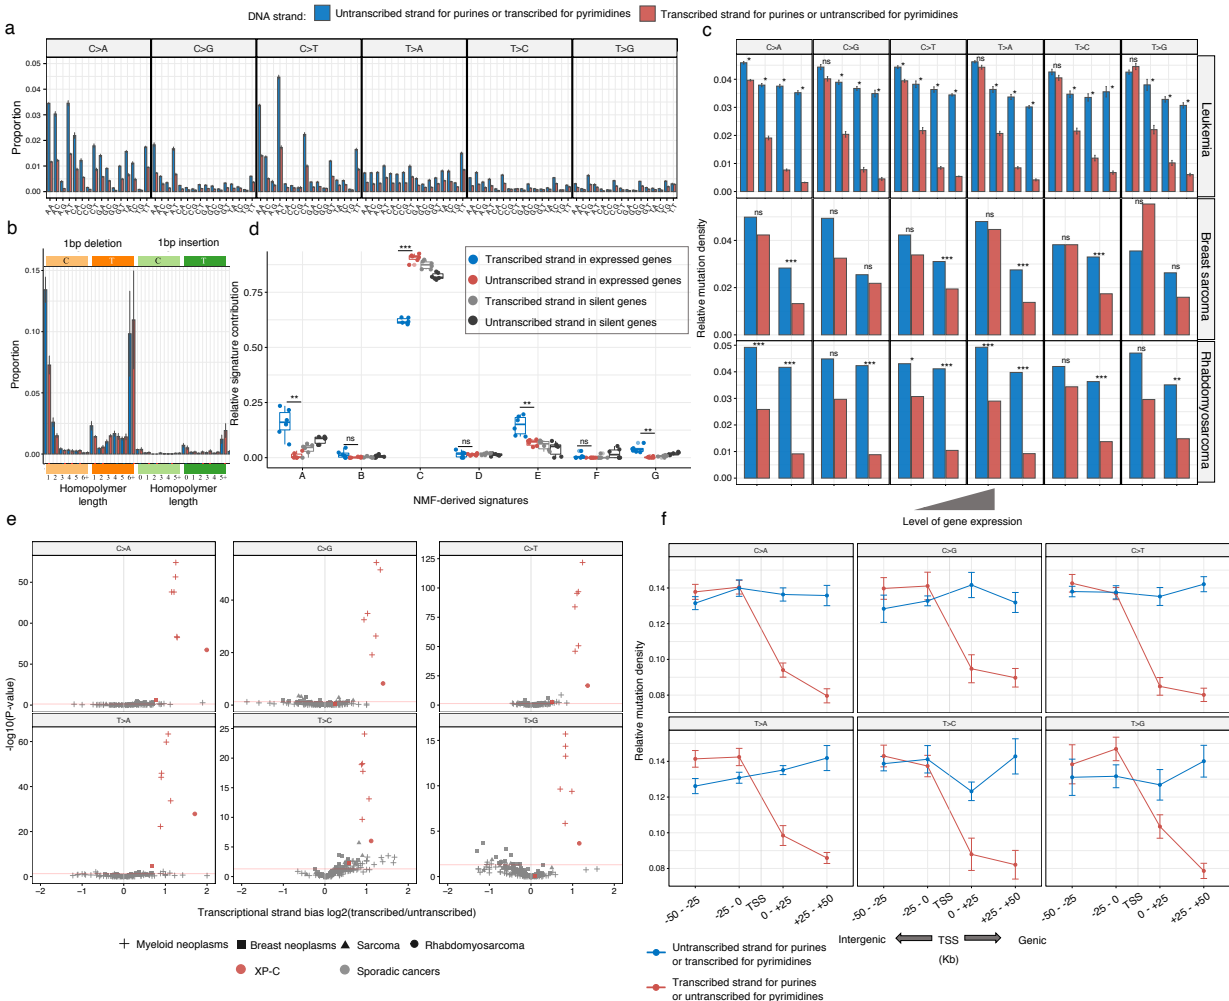

Figure 4

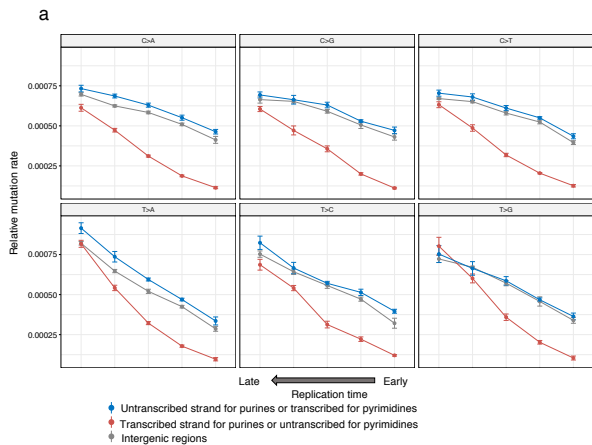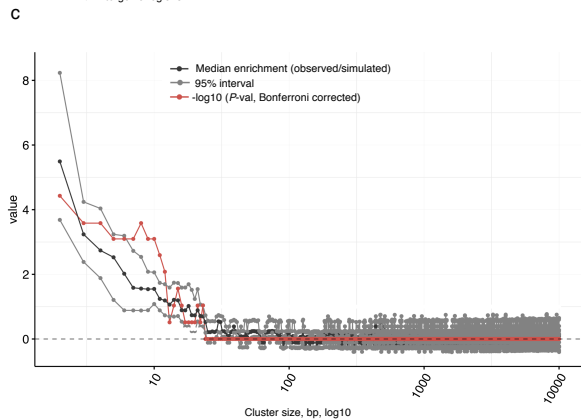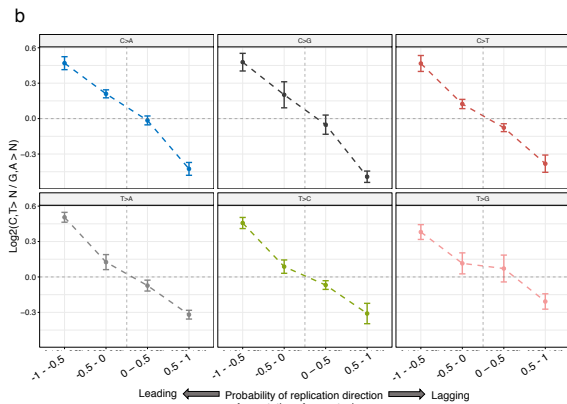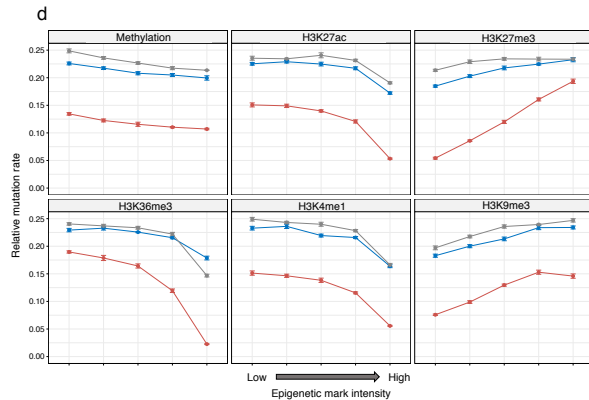



Figure 5

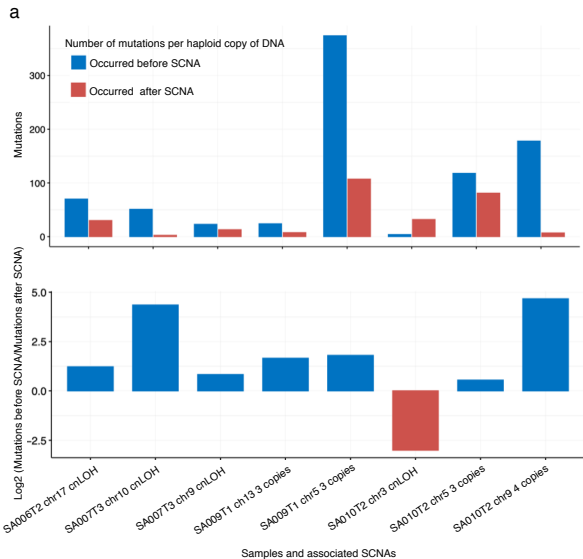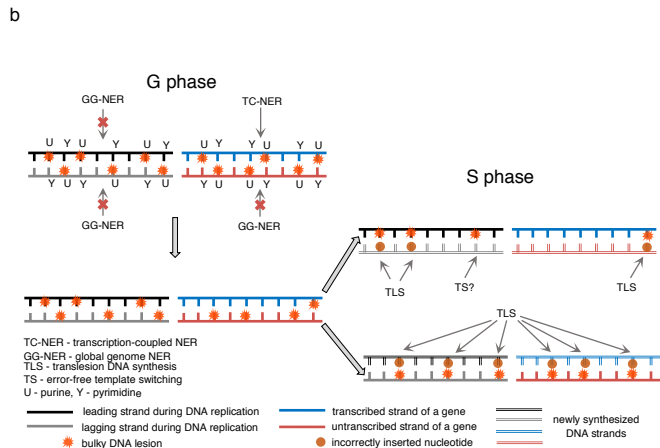

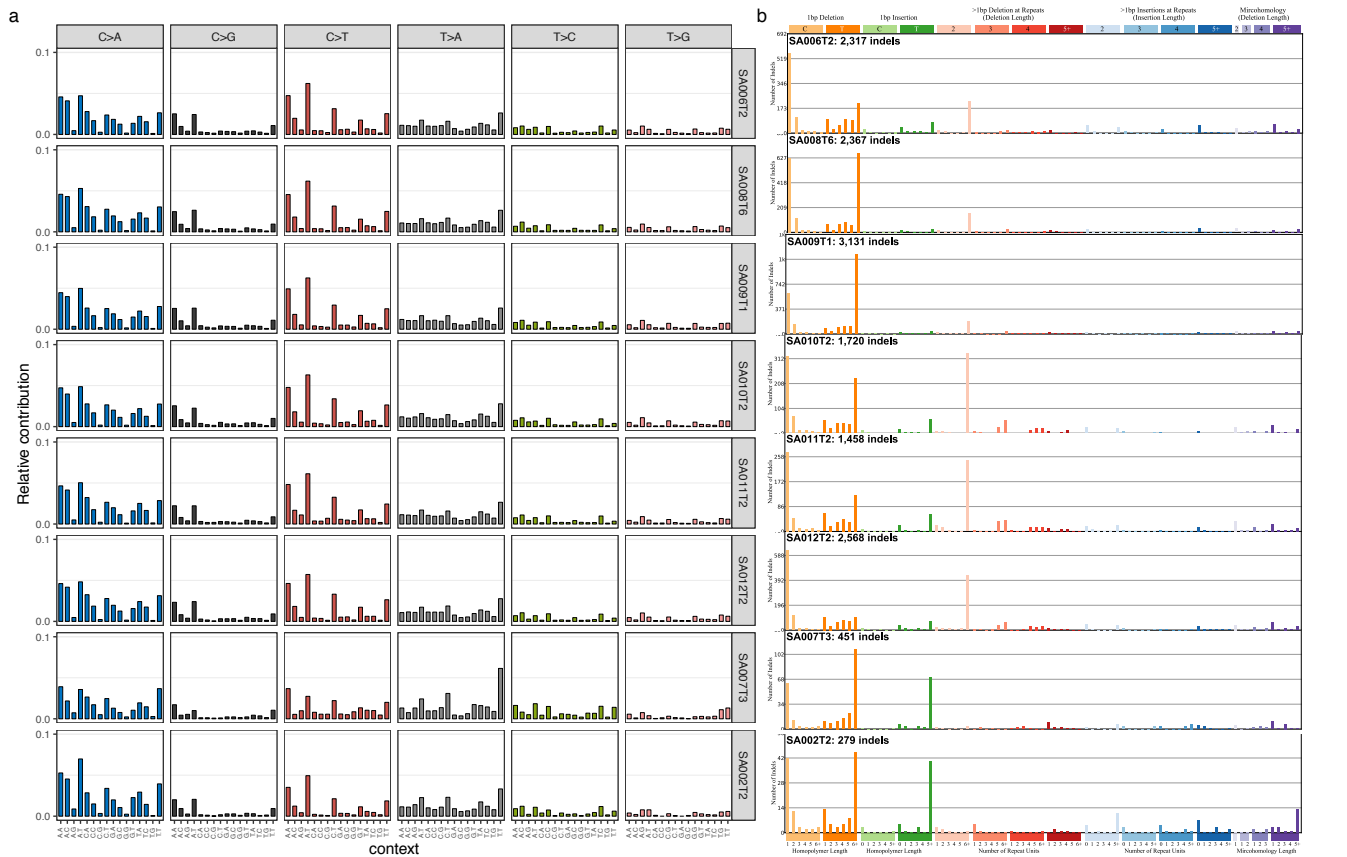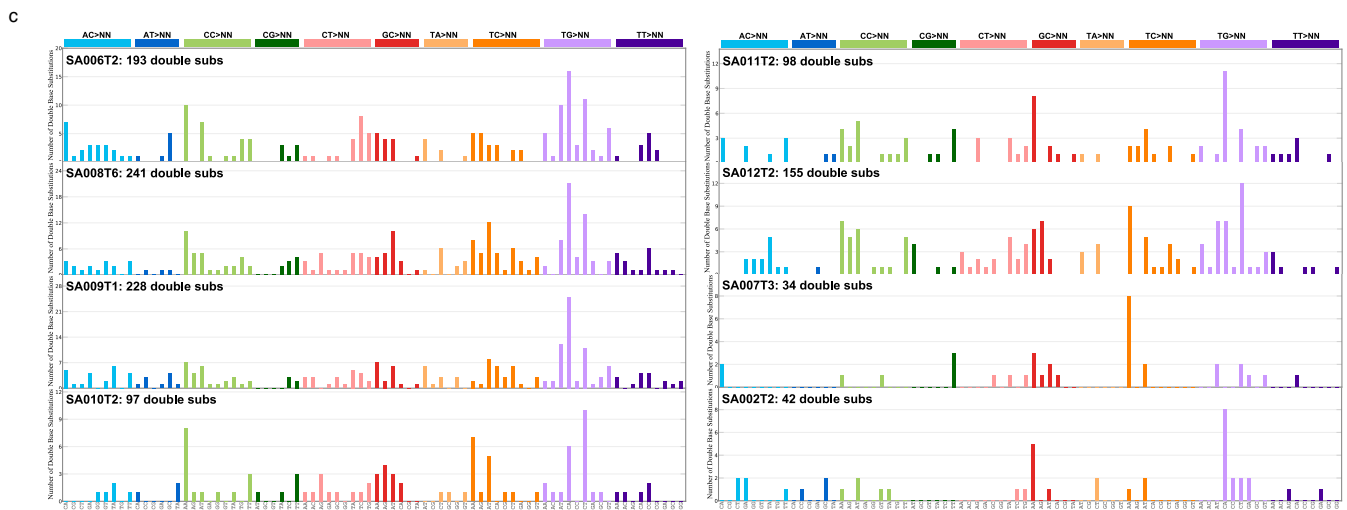

Supplementary Figure 2

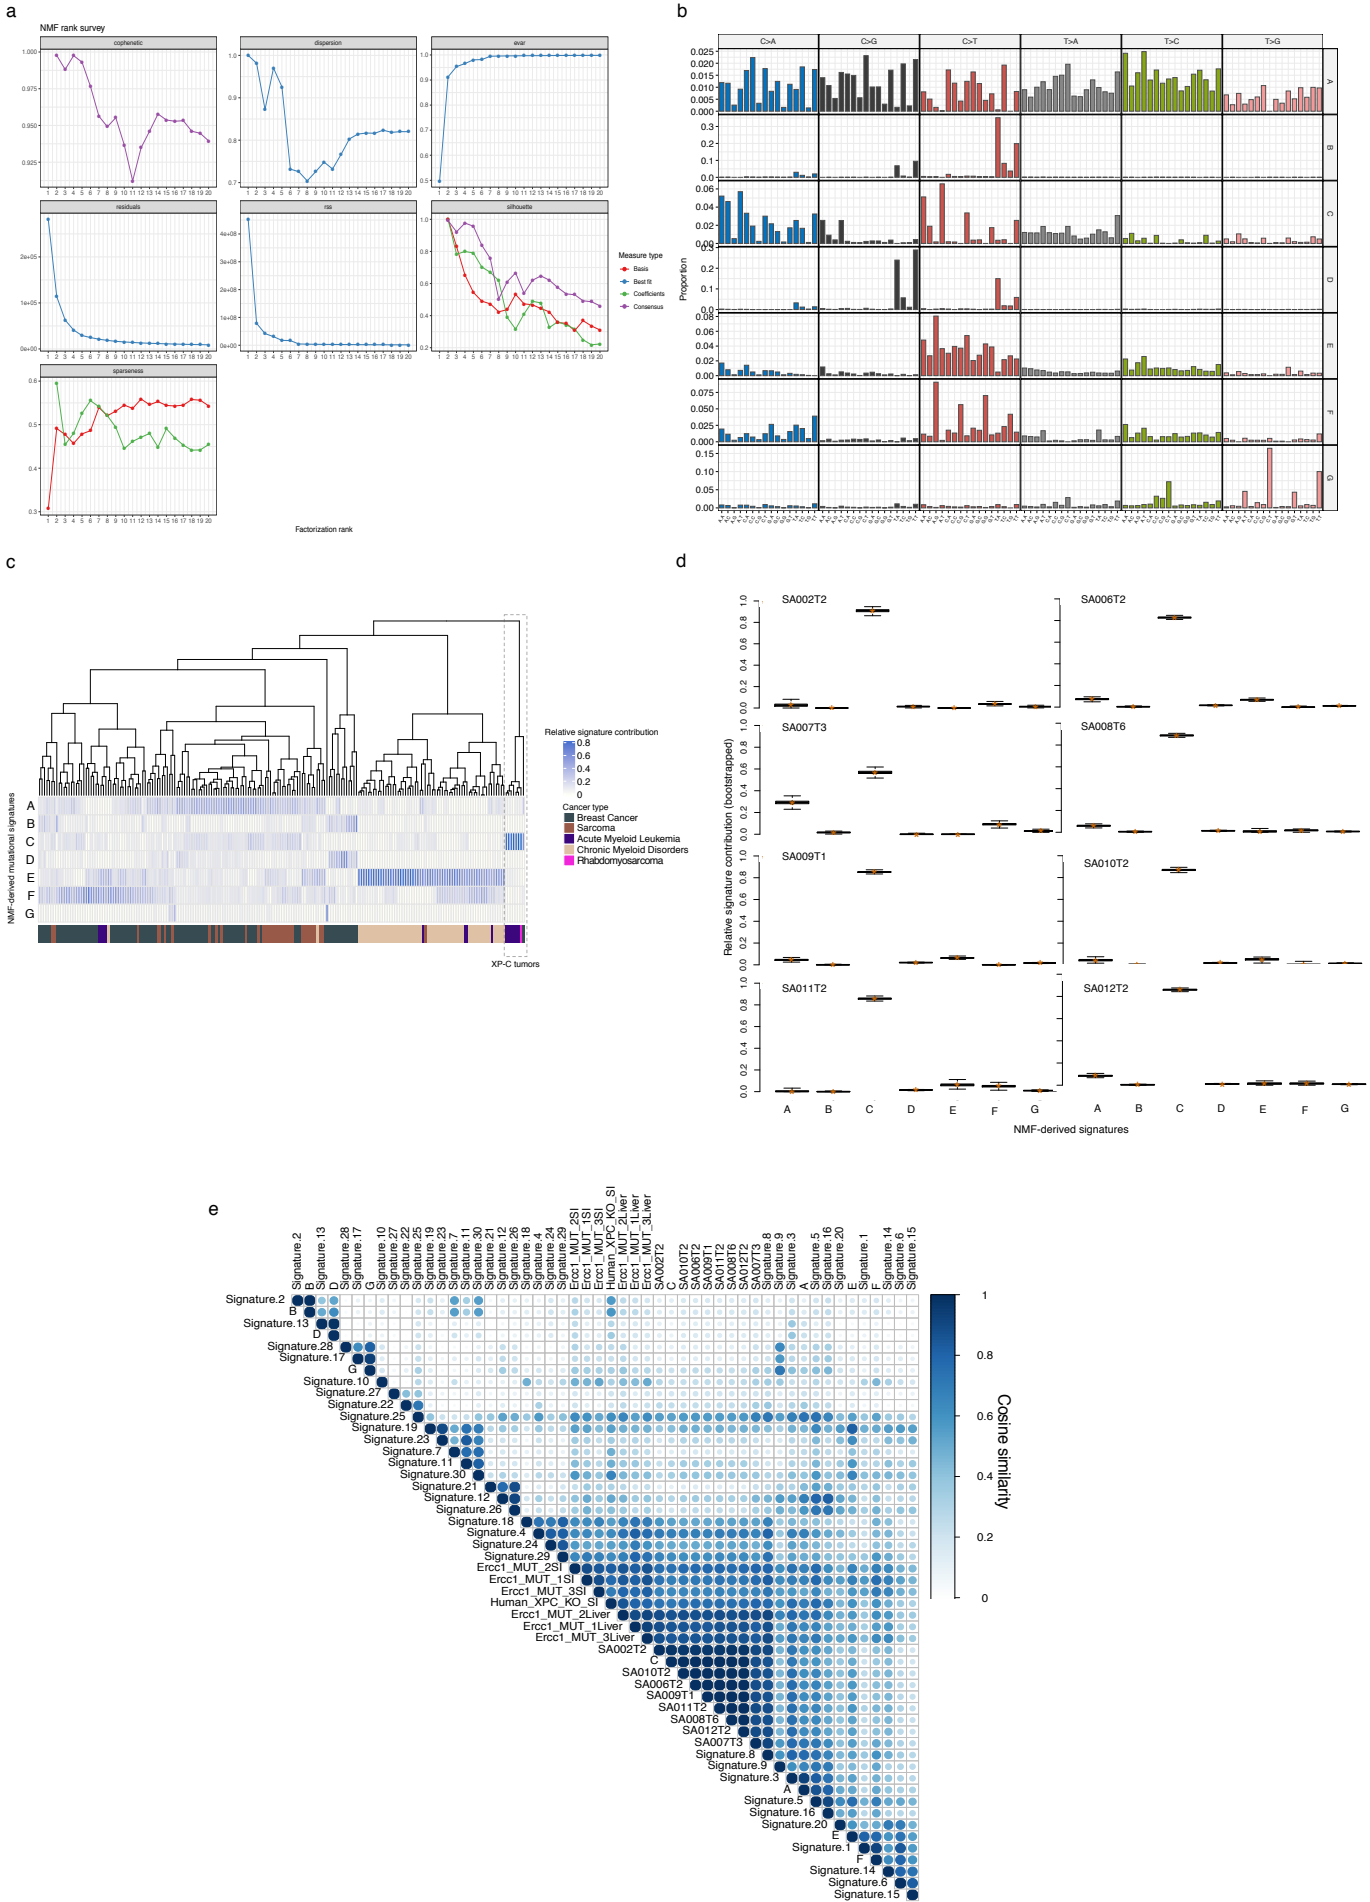

Supplementary Figure 3

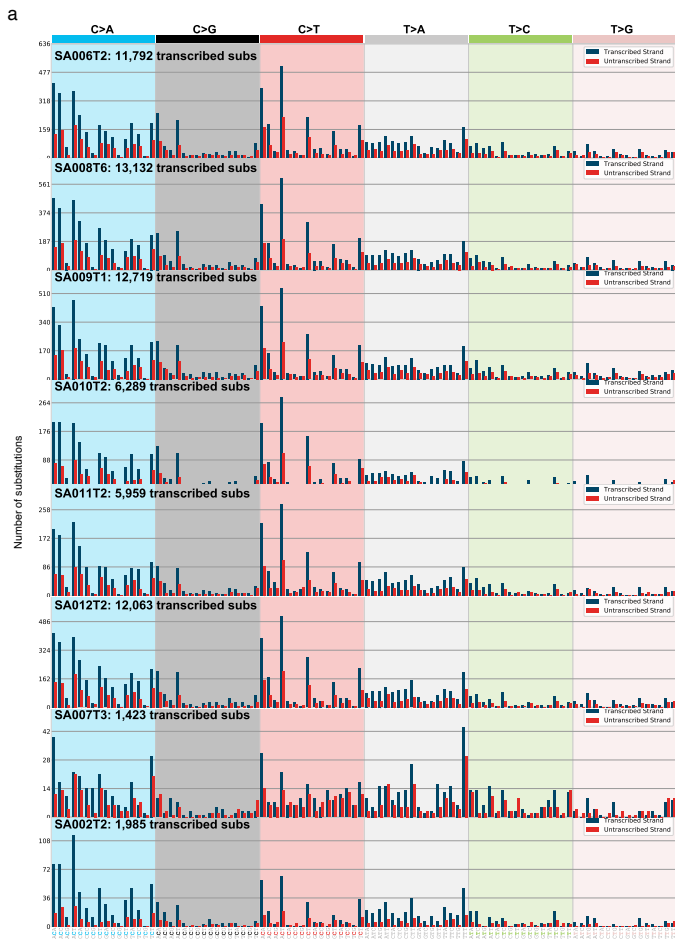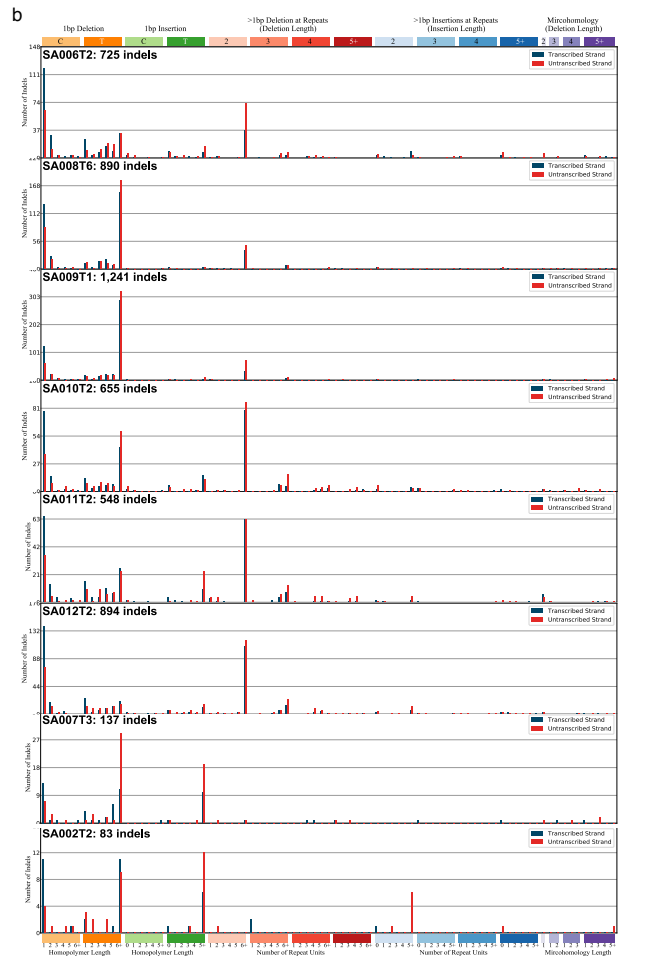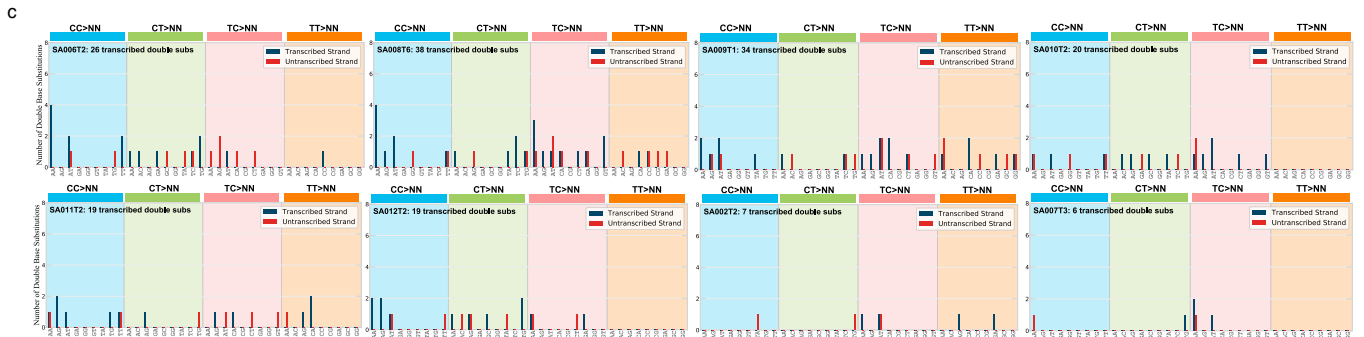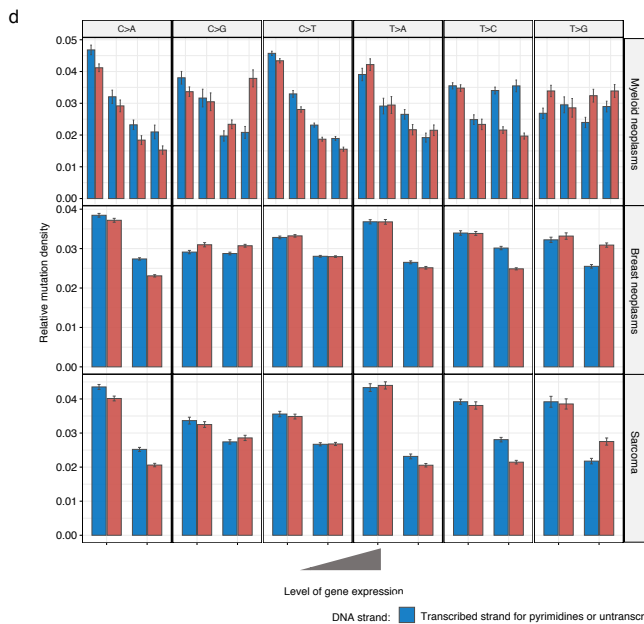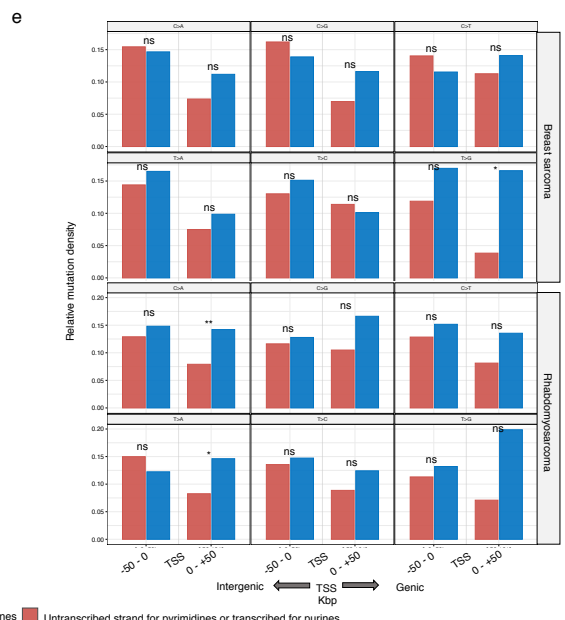

a

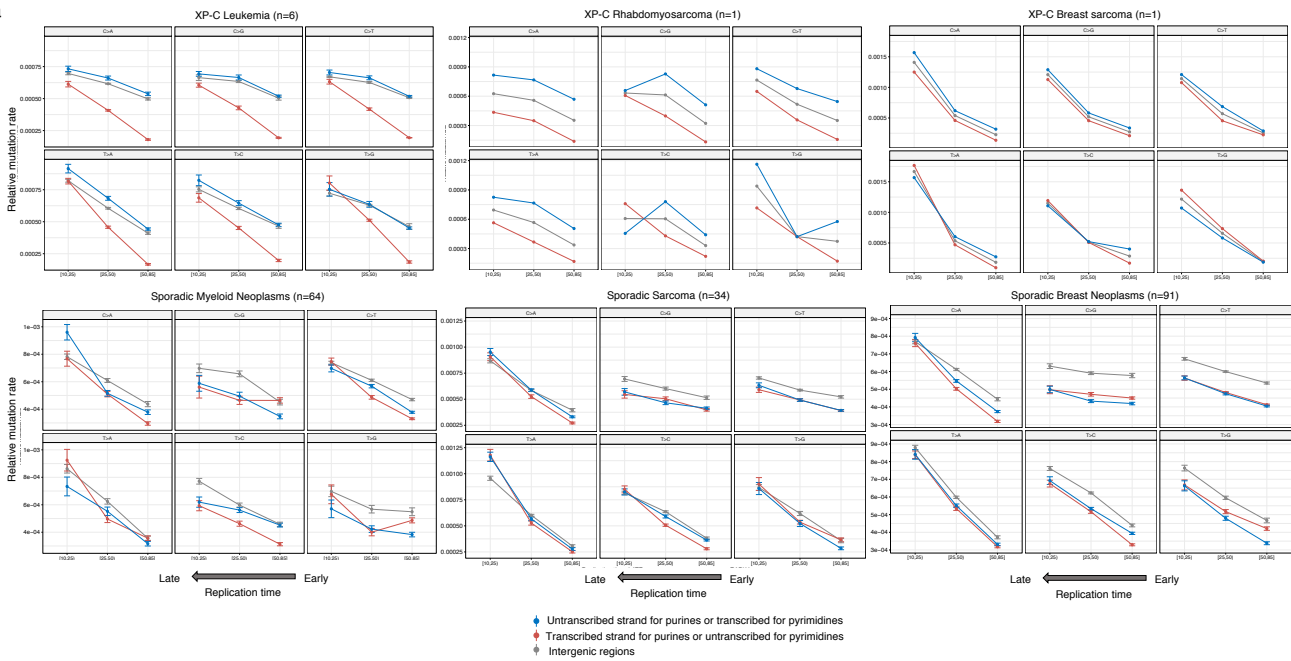

b

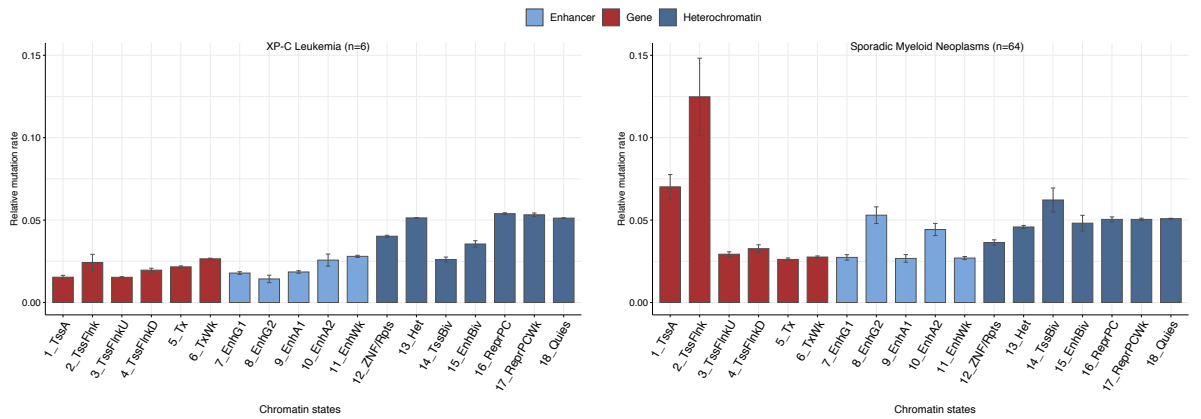

c

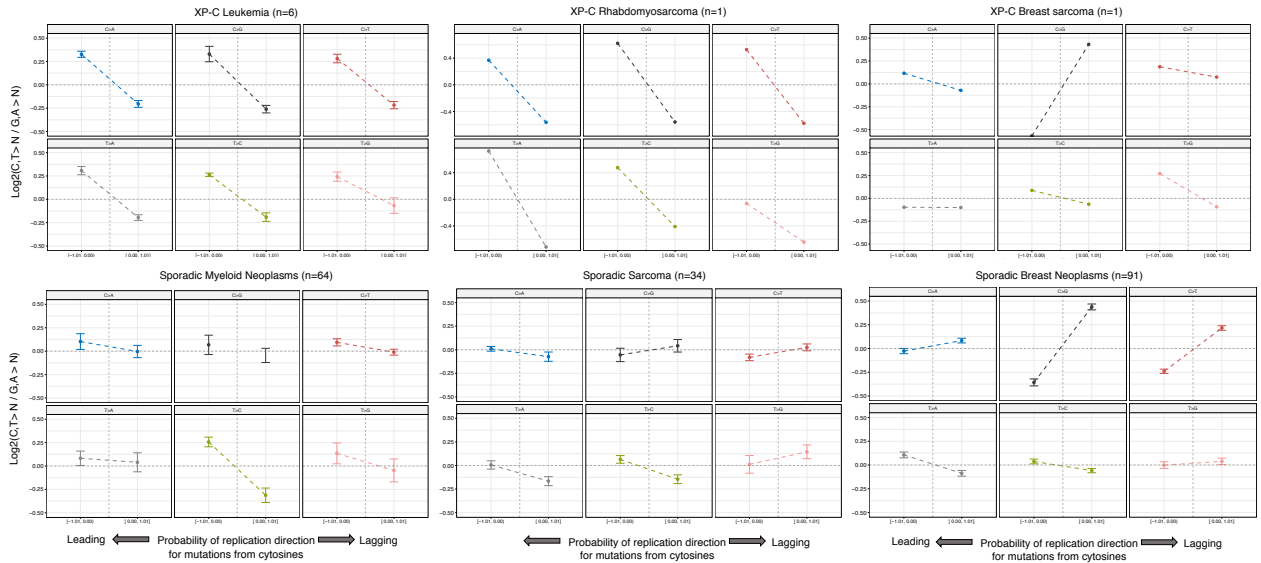

# Supplementary Figure 5

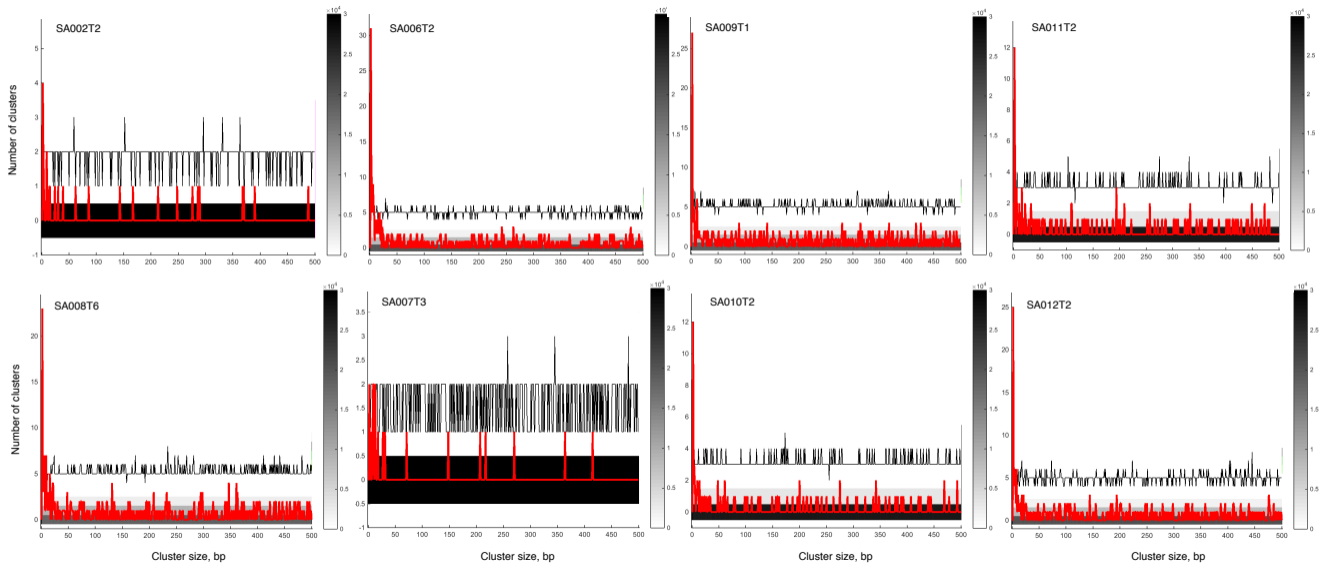

a

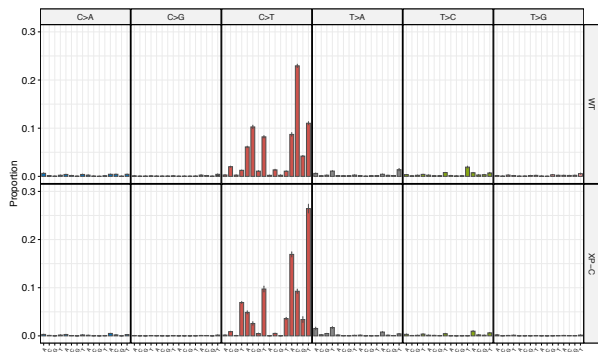

b

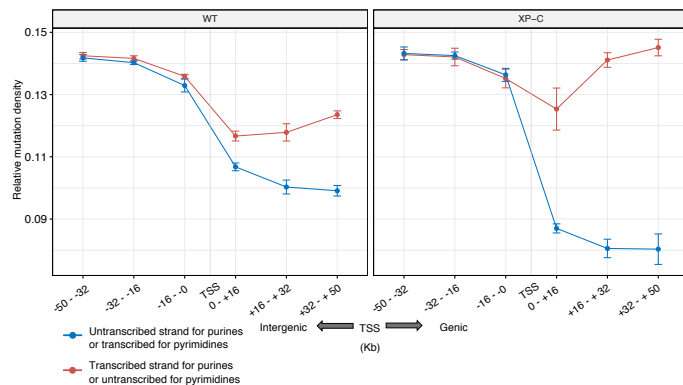

c

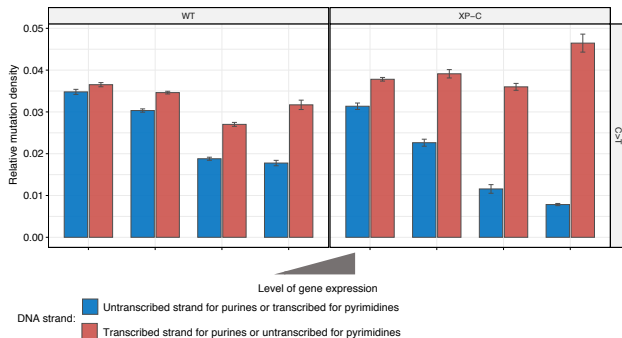

d

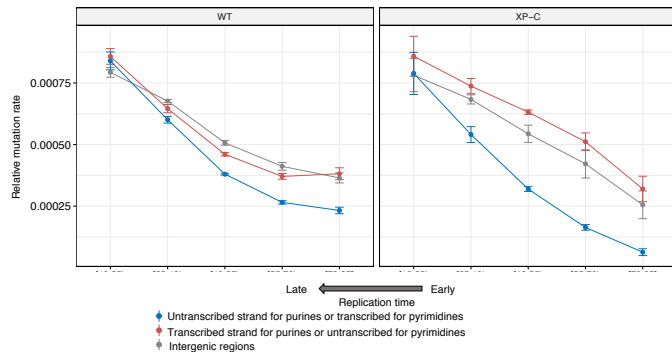

# Supplementary Figure 7

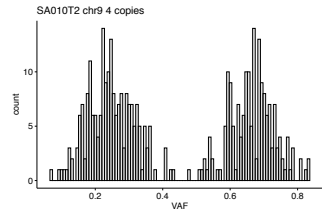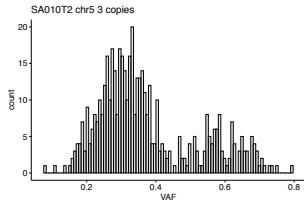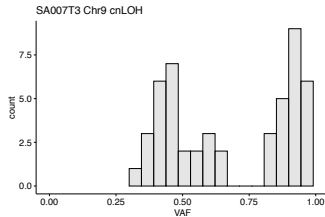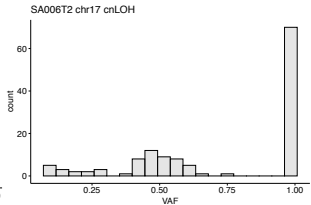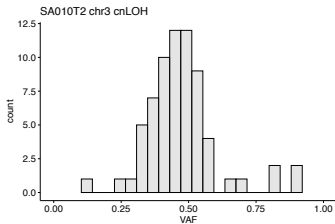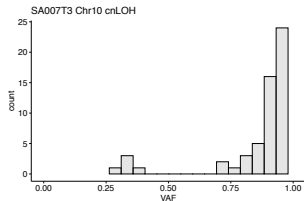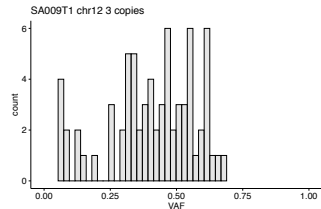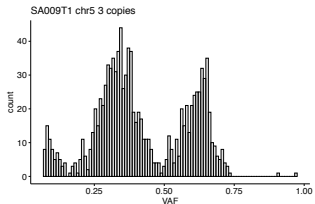

Source: https://biorxiv.org/content/10.1101/2020.07.13.200667v1.full.pdf
